# 1 Household Hardships during the COVID-19 Pandemic: Examining 2 Household Vulnerability and Responses to Pandemic Related Shocks 3 in Eastern Ethiopia

4 Jonathan A. Muir1†\*, Merga Dheresa2‡, Zachary J. Madewell3, Tamirat Getachew2, Gezahegn  
5 Mengesha2, Cynthia G. Whitney1, Nega Assefa2‡, and Solveig A. Cunningham1‡

6 1. Emory University, Atlanta, GA, United States

7 2. Haramaya University, Harar, Ethiopia

8 3. Center for Global Health, Centers for Disease Control and Prevention, Atlanta, GA, United States

9 †Co-first authors

10 ‡Co-senior authors

11 \* Correspondence: Jonathan A. Muir, Emory University, Atlanta, GA, United States, [jamuir@emory.edu](mailto:jamuir@emory.edu)

12 **Abstract:** COVID-19 is associated with one of the largest disturbances to life in the 21<sup>st</sup> century. To quell disease  
13 spread, governments implemented lockdowns that likely created hardships for households. To improve  
14 knowledge of consequences, we examine how the pandemic period was associated with household hardships and  
15 assess factors associated with these hardships. We conducted a cross-sectional study using quasi-Poisson regres-  
16 sion to examine factors associated with household hardships. Data were collected between August and September  
17 of 2021 from a random sample of 880 households living in a Health and Demographic Surveillance System (HDSS)  
18 located in the Harari Region and the District of Kersa, both in Ethiopia. Having a head of household with no edu-  
19 cation, residing in a rural area, larger household size, lower income and/or wealth, and community responses to  
20 COVID-19 including lockdowns and travel restrictions were independently associated with experiencing house-  
21 hold hardships. Our results identify characteristics of groups at-risk for food insecurity during the pan-  
22 demic; households that were already struggling prior to the onset of the pandemic were at greatest risk of adverse con-  
23 sequences during the pandemic period. These findings may inform future efforts to mitigate the consequences of  
24 COVID-19 and future disease out-breaks.

25 **Keywords:** SARS-CoV-2; Africa; Resilience; Vulnerability

26

## 27 1. Introduction

28 The COVID-19 pandemic resulted in one of the largest disturbances to life in the 21<sup>st</sup> century. Beyond  
29 direct health effects,[1] the pandemic had social and economic consequences as government-enforced  
30 lockdowns were implemented to stem the pace and severity of the disease.[2] To adhere to these  
31 lockdowns, many businesses closed their in-person offices temporarily; for some, business closure was  
32 permanent. Mitigation efforts also affected healthcare providers who had to restrict in-person access to  
33 patients and/or limit services. These efforts may have affected the health of young children, pregnant  
34 women, and mothers by limiting access to healthcare and sufficient food—especially in isolated re-  
35 gions of resource-limited countries.[3-16] These indirect effects, in return, would exacerbate direct  
36 effects of the SARS-CoV-2 virus by increasing risk for undernutrition and other conditions that  
37 heighten the danger of serious illness. [14,15] Knowledge on the extent to which households living in  
38 resource-limited countries have experienced resource restrictions and other hardships remains limited  
39 due to incomplete or nonexistent population surveillance.[17]

40 In sub-Saharan Africa (SSA), national governments undertook considerable efforts to quell the spread  
41 of COVID-19.[2,18] Mitigation efforts in Ethiopia included social distancing, lockdowns, and empha-  
42 sizing hygiene protocols; these efforts were started on March 16<sup>th</sup> of 2020, intensified on March 20<sup>th</sup>,  
43 and ultimately a state of emergency was declared on April 10<sup>th</sup>. [19] Economic and social disparities  
44 across different sociodemographic groups and geospatial inequalities may have resulted in uneven

45 implementation of these efforts.[11] These disparities may also have resulted in differential household  
46 and community vulnerability to unintended consequences of these efforts.

47 Vulnerability is the collective effect of cultural, economic, institutional, political, and social processes  
48 that modify the experience of and recovery from a given hazard.[20] In the context of disasters, it is  
49 often not the hazard itself that creates the disaster; rather, the disaster is the impact on individual and  
50 community coping patterns and the inputs and outputs of social systems.[21-23] Social vulnerability is  
51 partially the result of social disparities that shape or influence the susceptibility of different groups to  
52 hazards while also controlling their capacity to respond.[24,25] Individual and household level factors  
53 often associated with vulnerability include demographic characteristics such as age, ethnicity, race,  
54 and sex; socioeconomic status (e.g., income, wealth, employment, and/or education); household  
55 composition (e.g., presence of children or elderly); and housing and transportation.[26] However, so-  
56 cial vulnerability also involves place disparities stemming from characteristics of communities and the  
57 built environment. For example, differential availability of scarce resources between urban and rural  
58 areas may exacerbate individual and household level vulnerabilities to hazards.[27-29] To understand  
59 the broader consequences of the pandemic, it is important to consider economic, political, and social  
60 markers of vulnerability at the individual, household, and community level. [21-25]

61 In Ethiopia, those already burdened by social and economic disparities and limited in their ability to  
62 access resources are at greater risk for experiencing additional hardships during the  
63 pandemic.[7,11,18] Specific demographic groups disproportionately vulnerable include: older adults,  
64 people with disabilities or pre-existing medical conditions, the poor, people living in congested resi-  
65 dences and/or slums, pregnant women, and the unemployed. Rural populations in Ethiopia are at  
66 elevated risk for food insecurity and agricultural hardships as climate change, severe drought, conflict,  
67 and environmental degradation have culminated in societal shocks affecting livelihoods, particularly  
68 for farmers.[30,31] Populations lacking access to safe drinking water and/or sanitary environments,  
69 reliant upon emergency food aid, or with limited access to media or other communication technologies  
70 are also at greater risk of adverse consequences of the pandemic.[18] Differential vulnerability requires  
71 context specific interventions to address indirect costs of the pandemic.[32]

72 We used data from an existing Health and Demographic Surveillance System (HDSS) in Eastern  
73 Ethiopia to analyze the prevalence of household level hardships experienced during the pandemic and  
74 examine factors associated with vulnerability to these hardships. We further explore household re-  
75 sponses to these hardships and analyze factors associated with households using these coping strate-  
76 gies.

## 77 **2. Materials and Methods**

### 78 *2.1. Study setting*

79 The setting for this study is a predominantly rural area in the district of Kersa and an urban area in the  
80 Harari People's National Regional State in Eastern Ethiopia.[33,34] The rural area consists of 24 kebeles  
81 (a neighborhood or ward), and covers 353 km<sup>2</sup> with a population of 135,754 in 25,653 households. The  
82 urban area consists of 12 kebeles, a population of 55,773 in 14,768 households, across 25.4 km<sup>2</sup>. The  
83 population has been followed through a Health and Demographic Surveillance System since 2012,  
84 with demographic and health-related information regularly collected (see Figure 1).

85

86

87

88

89

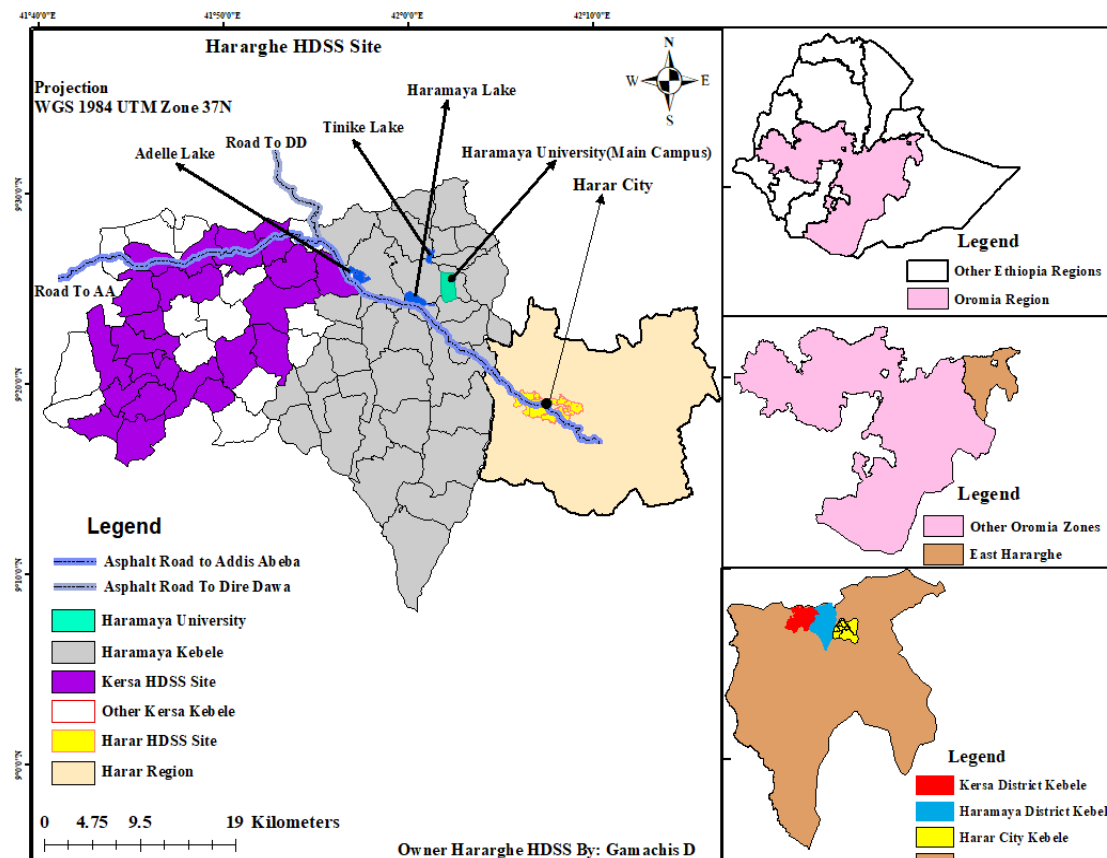

90

91 **Figure 1. The Harar and Kersa Health and Demographic Surveillance System (HDSS) in Eastern**  
92 **Ethiopia. The smaller map panels on the right identify the location of the HDSS catchment areas**  
93 **within Eastern Ethiopia.**

## 94 2.2. Study design

95 This study is part of a larger examination within the Child Health and Mortality Prevention Surveil-  
96 lance (CHAMPS) network to understand the consequences of COVID-19 lockdowns for child health  
97 and mortality.[34] We administered a short data collection questionnaire designed to understand how  
98 the pandemic and related lockdowns may have affected the livelihood, food availability, and  
99 healthcare of households. Households were selected using simple random sampling to achieve a  
100 sample size of 440 from the rural (Kersa) and from the urban (Harar) catchment areas (total sample  
101 size of 880). The sample size was specified to detect prevalence of changes in accessing healthcare. A  
102 priori specifications were 50% of the population experiencing changes, 95% CI, precision of 0.05 and  
103 non-response adjustment of 10%.

104 The survey questionnaire was structured into five sections: knowledge regarding the spread of  
105 COVID-19; food availability; COVID-19 related shocks/coping; under-five child healthcare services;  
106 and healthcare services for pregnant women. Questions in the survey instrument related to hardships  
107 associated with the pandemic period asked respondents to consider whether a given hardship had  
108 occurred since March of 2020. Data collectors were drawn from the fieldwork teams of HDSS enu-  
109 merators already trained and working in the HDSS. Data collection occurred between August and  
110 September of 2021 and was carried out through tablet-based in-person interviews with adult house-  
111 hold members. Survey data from the questionnaire were linked with data from the most recent HDSS  
112 round to incorporate additional demographic data about the respective household: specifically, age,

113 sex, occupation, and education of the head of household; the number of children under 5 years of age  
114 and the number of adults over age 60 in the household; and household assets and residence construc-  
115 tion materials. Data quality assurance and cleaning followed standard procedures for the HDSS.[33,35]  
116 Inconsistent or missing data were flagged for data collectors to correct. Field supervisors and the field  
117 coordinator selected a random sample of questionnaires for re-visits to validate the recorded infor-  
118 mation. Implementation of the module was approved by an Institutional Health Research Ethics Re-  
119 view Committee (IHRERC); approval reference number Ref.No.IHRERC/127/2021.

### 120 2.3. Measures

121 The variable of interest *Household Hardships* was generated as an additive index of the number of  
122 hardships a household reported experiencing during the COVID-19 pandemic (i.e., since March of  
123 2020); it was coded as a count variable ranging from 0 to 9. Information on household hardships were  
124 gathered from the following survey question: “Has your household been affected by any of these events since  
125 mid-March?” Responses included: job loss; nonfarm business closure; disruption of farming; disruption  
126 of livestock activities; disruption of fishing activities; increased price of farming or business inputs;  
127 decreased price of farming or business outputs, increased price of major food items consumed; and  
128 illness, injury, or death of any household member. The percentage of households that reported a given  
129 hardship is presented in Figure 2. The additive index had a Cronbach’s alpha score of 0.77 signifying  
130 high internal consistency.[36]

131

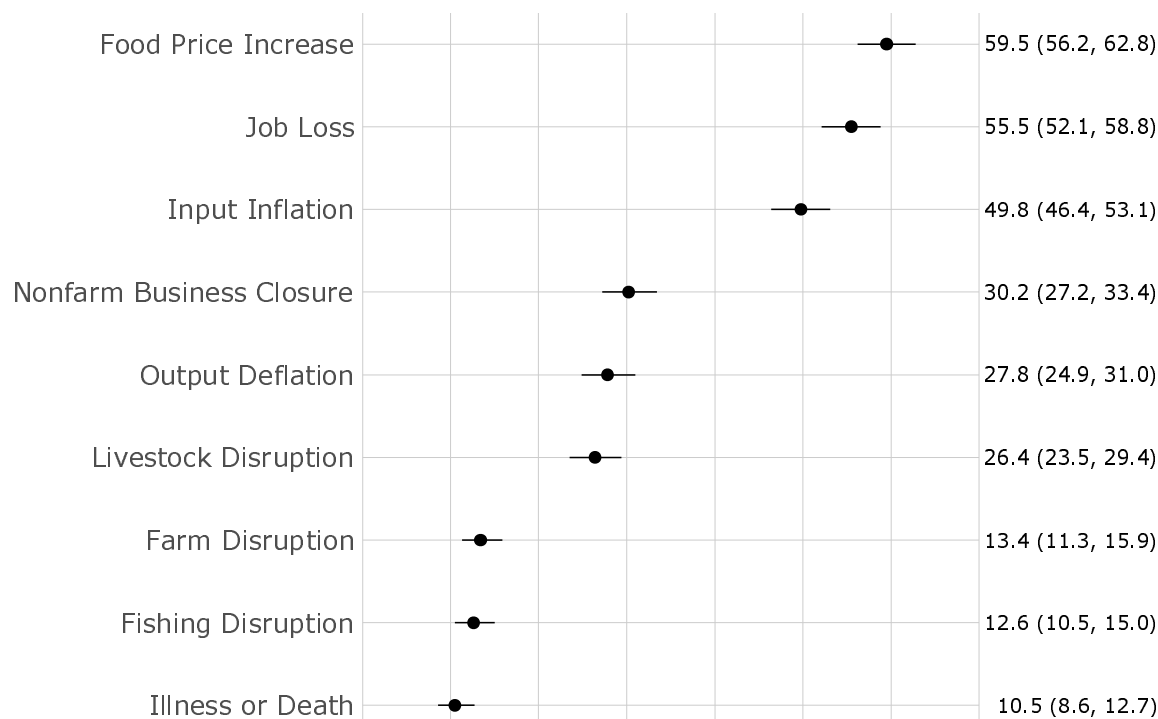

132

133 **Figure 2. Percentage of Households that Reported a Given Hardship.** Represents the distribution of  
134 hardships used in the additive index *Household Hardships* (n = 880).

135 To create an alternative representation of hardships, we used principal components analysis (PCA)  
136 with varimax rotation to extract orthogonal factors from the variables in *Household Hardships*. The ei-  
137 genvalues of the correlation matrix from PCA demonstrated that the first factor explained 40% of the  
138 variability in the data and the second explained 20%. Subsequent factors explained little variability.  
139 We opted to retain the first factor, which included job loss, nonfarm business closure, farm disruption,

140 livestock disruption, fishing disruption, and output inflation, as an index we termed *Household Dis-*  
141 *rptions*. Variables highly correlated with the factor were weighted against their eigenvector coeffi-  
142 cients. Details related to the PCA results for the *Household Disruptions* are presented in Appendix A.

143 Right-hand side variables in our analyses included information on the head of household, character-  
144 istics of the household and its homestead, and COVID-19 response variables. Head of household var-  
145 iables were *age* (coded as 1 = less than 40 years, 2 = 41 to 44 years, 3 = 45 to 60 years, and 4 = sixty years  
146 and above); *sex* (coded as male = 0 and female = 1); *ethnicity* (coded as Amhara = 1 (reference) and other  
147 = 2, which included Oromo, Somali, Gurage, Harari and Tigray); *education* (coded as no formal educa-  
148 tion = 0 (reference), any level of education = 1); *occupation* (coded as 1 = farmer/domestic (reference), 2  
149 = student, 3 = professional, 4 = sales, 5 = daily laborer, 6 = other employment, 7 = unemployed/retired).  
150 Household variables were *urbanicity* (coded as urban (Harar) = 1 and rural (Kersa) = 0); *household size*  
151 (coded as 1 = 1-2 individuals (reference), 2 = 3-4 individuals, 3 = 5-6 individuals, 4 = 7-8 individuals, 5 =  
152 9+ individuals); *children under age 5* (coded as 0 = no, 1 = yes); *adults over age 60* (coded as 0 = no, 1 = yes);  
153 monthly *income* (coded as 1 = 0-1,200 Birr Ethiopia Birr (reference), 2 = 1,201-2,000 Birr, 3 = 2,001-3,000  
154 Birr, 4 = 3,001-4,600 Birr, and 5 = 4,600+); and a *wealth index* based on a list of household assets (coded  
155 as an 1 = poorest (reference), 2 = poorer, 3 = middle, 4 = richer, 5 = richest). For information on the  
156 principal components analysis used to compute the wealth index see Appendix B. Covid response  
157 variables were used to analyze associations between household hardships and communi-  
158 ty/government interventions that were implemented to stem the severity of COVID-19. Responses  
159 were gathered from the following survey question: “*What steps has your community/government taken to*  
160 *curb the spread of the coronavirus in your area?*” Intervention variables analyzed include: *lockdowns*, *travel*  
161 *restrictions*, *business closures*, and *intervention centers*. Each of these variables were coded Yes = 1 and No  
162 = 0.

#### 163 2.4. Analytic Strategy

164 Data cleaning and analysis was performed using R version 4.2.0.[37] Education and occupation related  
165 data from the HDSS were missing for nine household heads; these households were removed from  
166 analyses that included these variables. A series of unadjusted quasi-Poisson regression models were  
167 used to analyze associations with the additive index *Household Hardships* and also with the PCA based  
168 index *Household Disruptions* (results from the unadjusted analyses are available upon request). Ad-  
169 justed quasi-Poisson regression models were then used to control for additional variables. Variables  
170 were included in the final adjusted model if their inclusion had theoretical justification. We assessed  
171 model fit with comparison of AIC and BIC scores—both scores were the smallest for the fully adjusted  
172 model, indicating that this model had superior fit compared to simpler or pathway specific models.  
173 Results are reported as Adjusted Incidence Rate Ratios (AIRR) with 95% confidence intervals (95% CI)  
174 and visualized with forest plots.[38,39] Given anticipated differences in demographic, economic, and  
175 social characteristics between populations living in urban vs. rural areas, effect modification was  
176 evaluated using interaction terms and visualized as predicted probabilities. A secondary analysis was  
177 conducted for those households that reported experiencing at least one hardship during the pandemic.  
178 This analysis used adjusted logistic regression to examine factors associated with household responses  
179 to pandemic hardships. We present results for the response strategies that were used by at least 10% of  
180 households.

### 181 3. Results

182 Only 13% of households reported not experiencing any of the measured hardships; the remaining 87%  
183 experienced at least one hardship (see Figure 3). The average number of hardships experienced during  
184 the pandemic was 2.86 with a standard deviation of 2.31; the interquartile range spanned 1 to 4 hard-  
185 ships. A majority of households (59.5%) observed an increase in local food prices (see Figure 2). Other  
186 common hardships included a household member losing their job (55.5%), observing increases in the  
187 cost of inputs for businesses or farms (49.8%), nonfarm business closures (30.2%), and reductions in the  
188 value of business or farming outputs (27.8%).

189

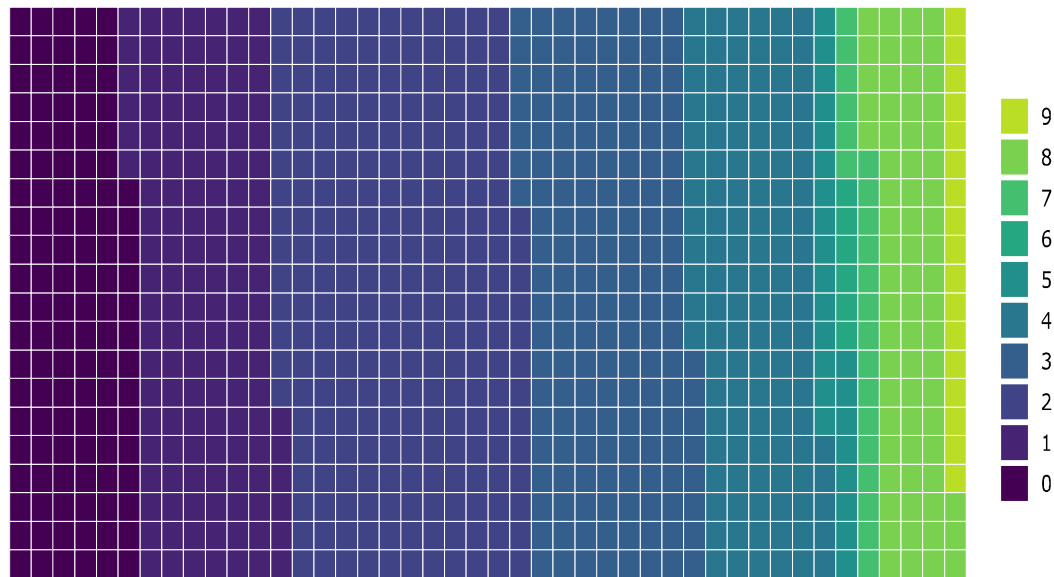

190

191

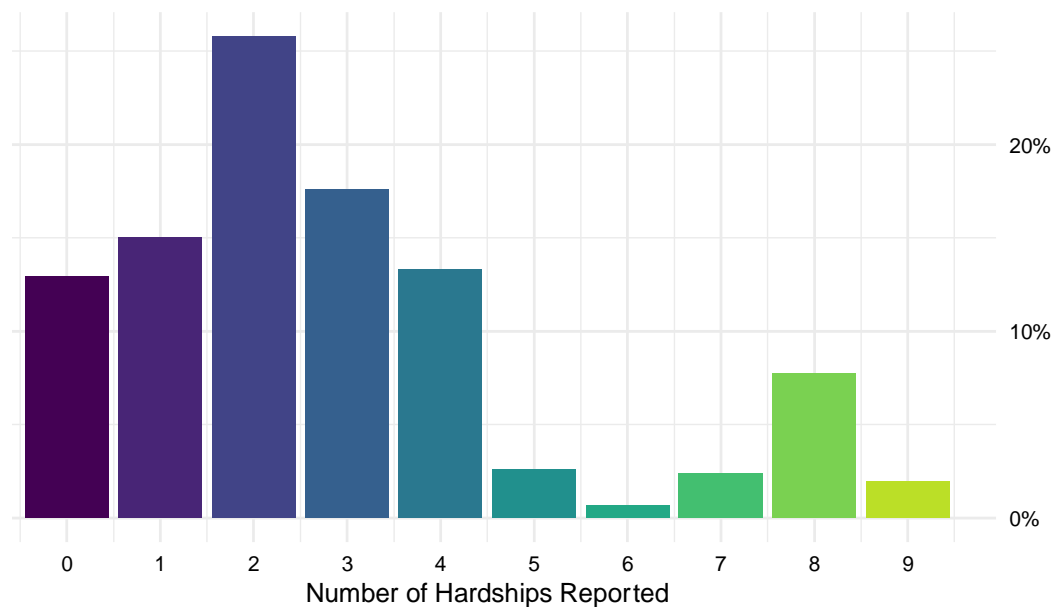

192

193

194 **Figure 3. Number of Hardships Experienced during the COVID-19 Pandemic (n = 880).** Figure 3a.  
195 presents a heat map of the number of hardships reported by the 880 sampled households. Figure 3b.  
196 presents the distribution of the additive index *Household Hardships*.

197 A majority of households (66%) were headed by a male household member (Table 1). Average age of  
198 the household head was 43 years with a standard deviation of 15. Roughly a quarter of household  
199 heads were from the Amhara ethnic group. A majority (58%) of household heads had obtained some  
200 level of education; their most common occupations were farmer (46%) and professional (27%). The  
201 median number of household members was 5 with a standard deviation of 2.4. Roughly a third of  
202 households reported having at least one child under the age of 5 and 27% of households had at least  
203 one adult family member over the age of 60. The most commonly reported government/community

204 responses to the pandemic were business closures (48%) followed by travel restrictions (46%) and the  
 205 establishment of isolation centers (44%).

206 Table 1. Descriptive Statistics (n = 880)

|                                          |                    | Total | %   | Urbanicity |     | χ <sup>2</sup> | p-value |       |        |
|------------------------------------------|--------------------|-------|-----|------------|-----|----------------|---------|-------|--------|
|                                          |                    |       |     | Urban      | %   |                |         | Rural | %      |
| <b>Head of Household Characteristics</b> |                    |       |     |            |     |                |         |       |        |
| Age                                      | <40                | 218   | 25% | 105        | 24% | 113            | 26%     | 0.8   | 0.853  |
|                                          | 41-50              | 265   | 30% | 136        | 31% | 129            | 29%     |       |        |
|                                          | 51-60              | 179   | 20% | 87         | 20% | 92             | 21%     |       |        |
|                                          | 60+                | 218   | 25% | 112        | 25% | 106            | 24%     |       |        |
| Sex                                      | Female             | 303   | 34% | 192        | 44% | 111            | 25%     | 33.0  | <0.001 |
|                                          | Male               | 577   | 66% | 248        | 56% | 329            | 75%     |       |        |
| Ethnicity                                | Amhara             | 222   | 25% | 192        | 44% | 30             | 7%      | 158.1 | <0.001 |
|                                          | Other              | 658   | 75% | 248        | 56% | 410            | 93%     |       |        |
| Education                                | Some Education     | 510   | 58% | 78         | 18% | 283            | 65%     | 201.0 | <0.001 |
|                                          | No Education       | 361   | 41% | 360        | 82% | 150            | 35%     |       |        |
| Occupation                               | Farmer/Domestic    | 401   | 46% | 89         | 20% | 312            | 72%     | 255.2 | <0.001 |
|                                          | Student            | 59    | 7%  | 34         | 8%  | 25             | 6%      |       |        |
|                                          | Professional/Sales | 236   | 27% | 186        | 42% | 50             | 12%     |       |        |
|                                          | Daily Laborer      | 67    | 8%  | 53         | 12% | 14             | 3%      |       |        |
|                                          | Other work         | 21    | 2%  | 8          | 2%  | 13             | 3%      |       |        |
|                                          | Unemployed/Retire  | 87    | 10% | 68         | 16% | 19             | 4%      |       |        |
| <b>Household Characteristics</b>         |                    |       |     |            |     |                |         |       |        |
| Household Size                           | 1-2                | 146   | 17% | 94         | 21% | 52             | 12%     | 99.0  | <0.001 |
|                                          | 3-4                | 257   | 29% | 168        | 38% | 89             | 20%     |       |        |
|                                          | 5-6                | 247   | 28% | 122        | 28% | 125            | 28%     |       |        |
|                                          | 7-8                | 171   | 19% | 37         | 8%  | 134            | 30%     |       |        |
|                                          | 9+                 | 59    | 7%  | 19         | 4%  | 40             | 9%      |       |        |
| Children Under Age 5                     | No                 | 578   | 66% | 322        | 73% | 256            | 58%     | 22.0  | <0.001 |
|                                          | Yes                | 302   | 34% | 118        | 27% | 184            | 42%     |       |        |
| Adults Over Age 60                       | No                 | 644   | 73% | 306        | 70% | 338            | 77%     | 6.0   | 0.015  |
|                                          | Yes                | 236   | 27% | 134        | 30% | 102            | 23%     |       |        |
| Income (Birr)                            | 4,600+             | 172   | 20% | 125        | 28% | 49             | 11%     | 55.1  | <0.001 |
|                                          | 3,001 - 4,600      | 132   | 15% | 71         | 16% | 63             | 14%     |       |        |
|                                          | 2,001 - 3,000      | 165   | 19% | 75         | 17% | 93             | 21%     |       |        |
|                                          | 1,201 - 2,000      | 209   | 24% | 73         | 17% | 137            | 31%     |       |        |
|                                          | 0 - 1,200          | 192   | 22% | 96         | 22% | 97             | 22%     |       |        |
| Wealth Index                             | Richest            | 180   | 20% | 95         | 22% | 85             | 19%     | 13.4  | 0.009  |
|                                          | Richer             | 174   | 20% | 87         | 20% | 87             | 20%     |       |        |
|                                          | Middle             | 174   | 20% | 72         | 16% | 102            | 23%     |       |        |
|                                          | Poorer             | 176   | 20% | 81         | 18% | 95             | 22%     |       |        |
|                                          | Poorest            | 176   | 20% | 105        | 24% | 71             | 16%     |       |        |
| <b>Covid Response</b>                    |                    |       |     |            |     |                |         |       |        |
| Business Closures                        | No                 | 461   | 52% | 228        | 52% | 233            | 53%     | 0.1   | 0.736  |
|                                          | Yes                | 419   | 48% | 212        | 48% | 207            | 47%     |       |        |
| Isolation Centers                        | No                 | 497   | 56% | 253        | 58% | 244            | 55%     | 0.4   | 0.541  |
|                                          | Yes                | 383   | 44% | 187        | 43% | 196            | 45%     |       |        |
| Lockdowns                                | No                 | 502   | 57% | 264        | 60% | 238            | 54%     | 3.1   | 0.077  |
|                                          | Yes                | 378   | 43% | 176        | 40% | 202            | 46%     |       |        |
| Travel Restrictions                      | No                 | 474   | 54% | 227        | 52% | 247            | 56%     | 1.8   | 0.176  |
|                                          | Yes                | 406   | 46% | 213        | 48% | 193            | 44%     |       |        |

207

208 n= 880.

209 Data source: CHAMPS Ethiopia Lockdown Module data and CHAMPS Ethiopia Health and Demographic Surveillance data.

210 Notes: Nine observations were missing for head of household's education and occupation. One observation was missing for whether a household had experienced food insecurity prior to the onset of COVID-19. The "other" category for ethnicity included: Oromo, Somali, Gurage, Harari, Tigray, and "other". One observation was missing for whether a household had experienced food insecurity prior to the onset of COVID-19.

### 213 3.1. Factors Associated with Household Hardships

214 After adjusting for other variables (see Figure 4), households were more likely to report hardships during the pandemic if the household resided in a rural compared to an urban area (AIRR = 1.34, 95% CI [1.20, 1.49]). Compared to households with 1 to 2 household members, larger households were also more likely to report hardships during the pandemic; for example, for households with 7-8 members, the AIRR for experiencing hardships during the pandemic was 1.42 (95% CI [1.24, 4.65]). In contrast, households were less likely to report experiencing hardships during the pandemic if the household head had at least some education compared to none (AIRR = 0.87, 95% CI [0.79, 0.96]); was employed in a professional occupation (AIRR = 0.75, 95% CI [0.66, 0.84]) or as a day laborer (AIRR = 0.74, 95% CI [0.62, 0.88]) compared to employment in agriculture; had a monthly household income greater than 1,200 Birr (for example, the AIRR for experiencing hardships during the pandemic for households with a monthly income greater than 4,600 Birr was 0.57 (95% CI [0.49, 0.66])); or were wealthier compared to the poorest households. Households were also more likely to report experiencing hardships during the pandemic if they also reported local community/government implementation of lockdowns (AIRR = 1.29, 95% CI [1.14, 1.46]), travel restrictions (AIRR = 1.38, 95% CI [1.23, 1.56]), and the establishment of isolations centers (AIRR = 1.17, 95% CI [1.03, 1.33]). The age, sex, and ethnicity of the household head as well as the presence of children under the age of 5 or adults older than age 60 in the household were not associated with household hardships after adjusting for other variables. Results from the analysis of the *Household Disruptions* index (Figure 5) were generally consistent with the results from analyzing the *Household Hardships* index.

233 Baseline predicted probabilities of household experiences with hardships during the pandemic based on *urbanicity* (urban vs. rural residence) as well as probabilities estimated from models including interaction terms with other variables are presented as a facet grid in Figure 6. The top facet presents the elevated probability of experiencing hardships during the pandemic for households living in a rural compared to an urban area while holding all other variables at their mean. These baseline probabilities were estimated using results from the analytic model presented in Figure 5. The remaining facets present predicted probabilities estimated from models that included statistically significant interaction terms between *urbanicity* and other variables associated with *Household Hardships* while holding all adjusting variables at their mean. The predicted probabilities indicate that households with a household head that identified as an ethnic group other than the Amhara or had no education were primarily at greater risk of experience hardships if they were residing in a rural area compared to an urban area. Dramatic dose responses of higher probability for experiencing hardships are seen for larger households, households with lower income, and households with lower wealth that were residing in a rural area compared to an urban area. In contrast, while the overall probability of experiencing hardships was higher for households living in a rural area, local implementation of lockdowns and business closures as a response to the pandemic were only associated with higher probability of experiencing hardships for those households living in an urban area.



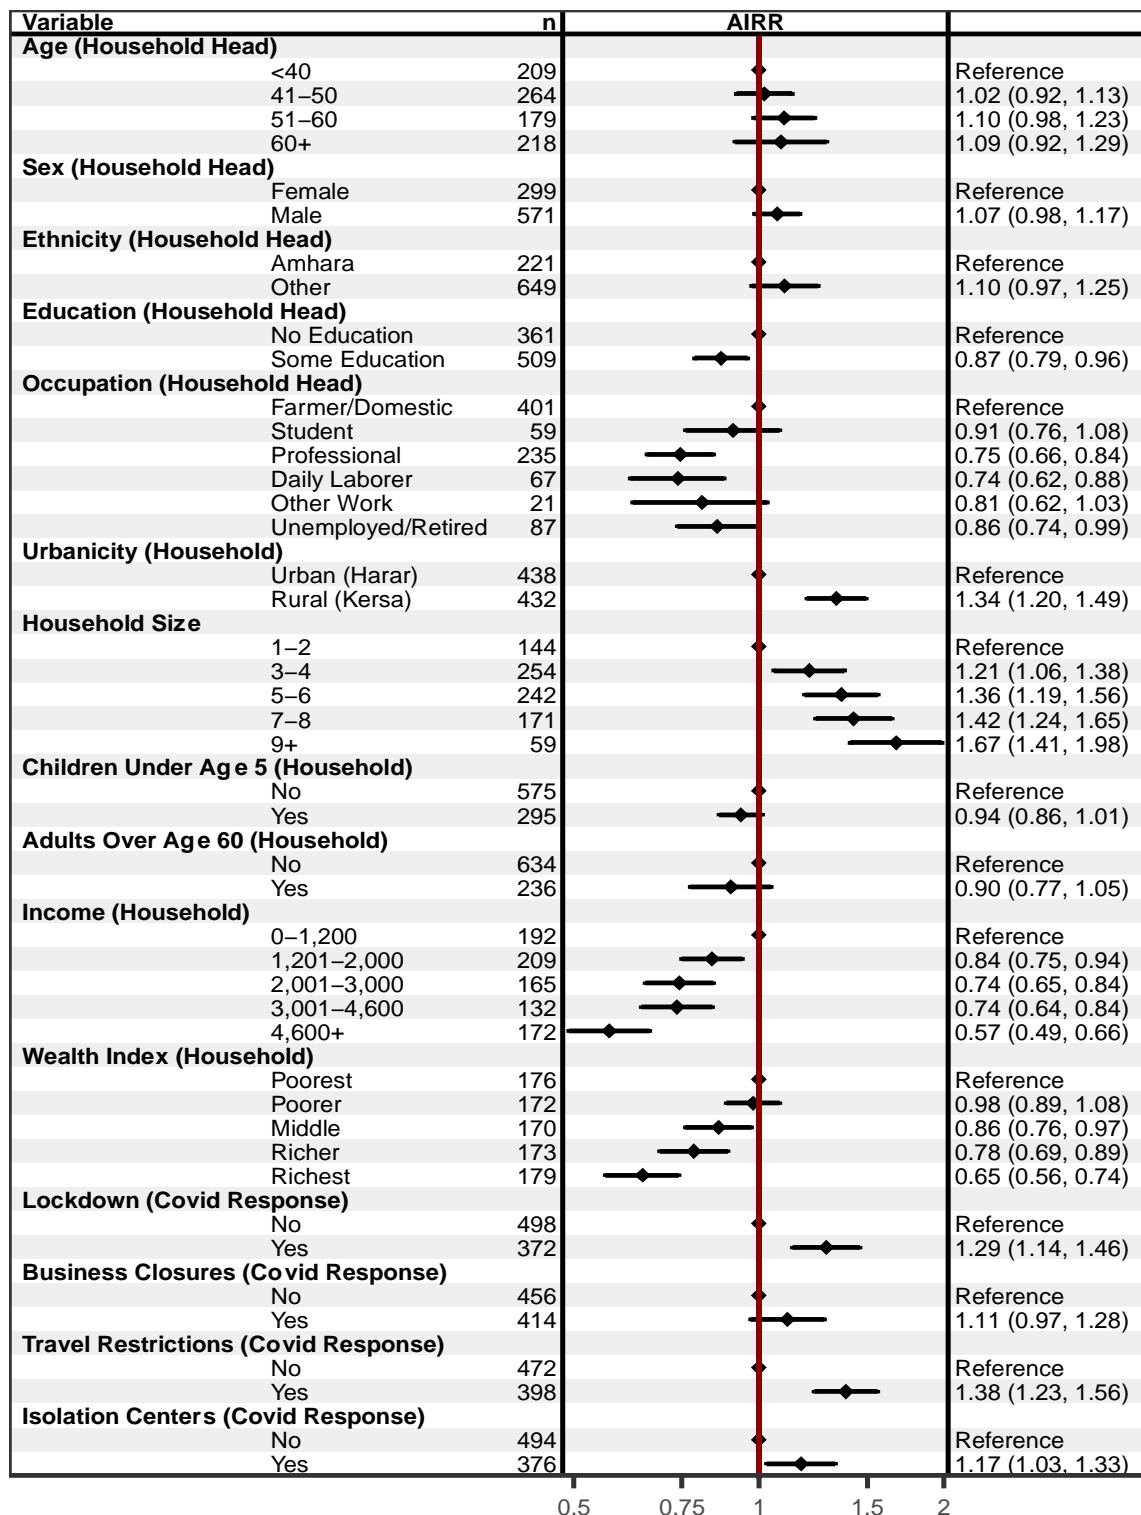

250

251

252

253

254

Figure 4. Adjusted Association with *Household Hardships* presented as Adjusted Incidence Rate Ratios (AIRR). The forest plot presents AIRRs with 95% confidence intervals from a multivariate quasi-Poisson regression model. The AIRRs were adjusted for the other variables included in the model. Education and Occupation had 9 missing values; Income had one outlier set to missing. (n=870)

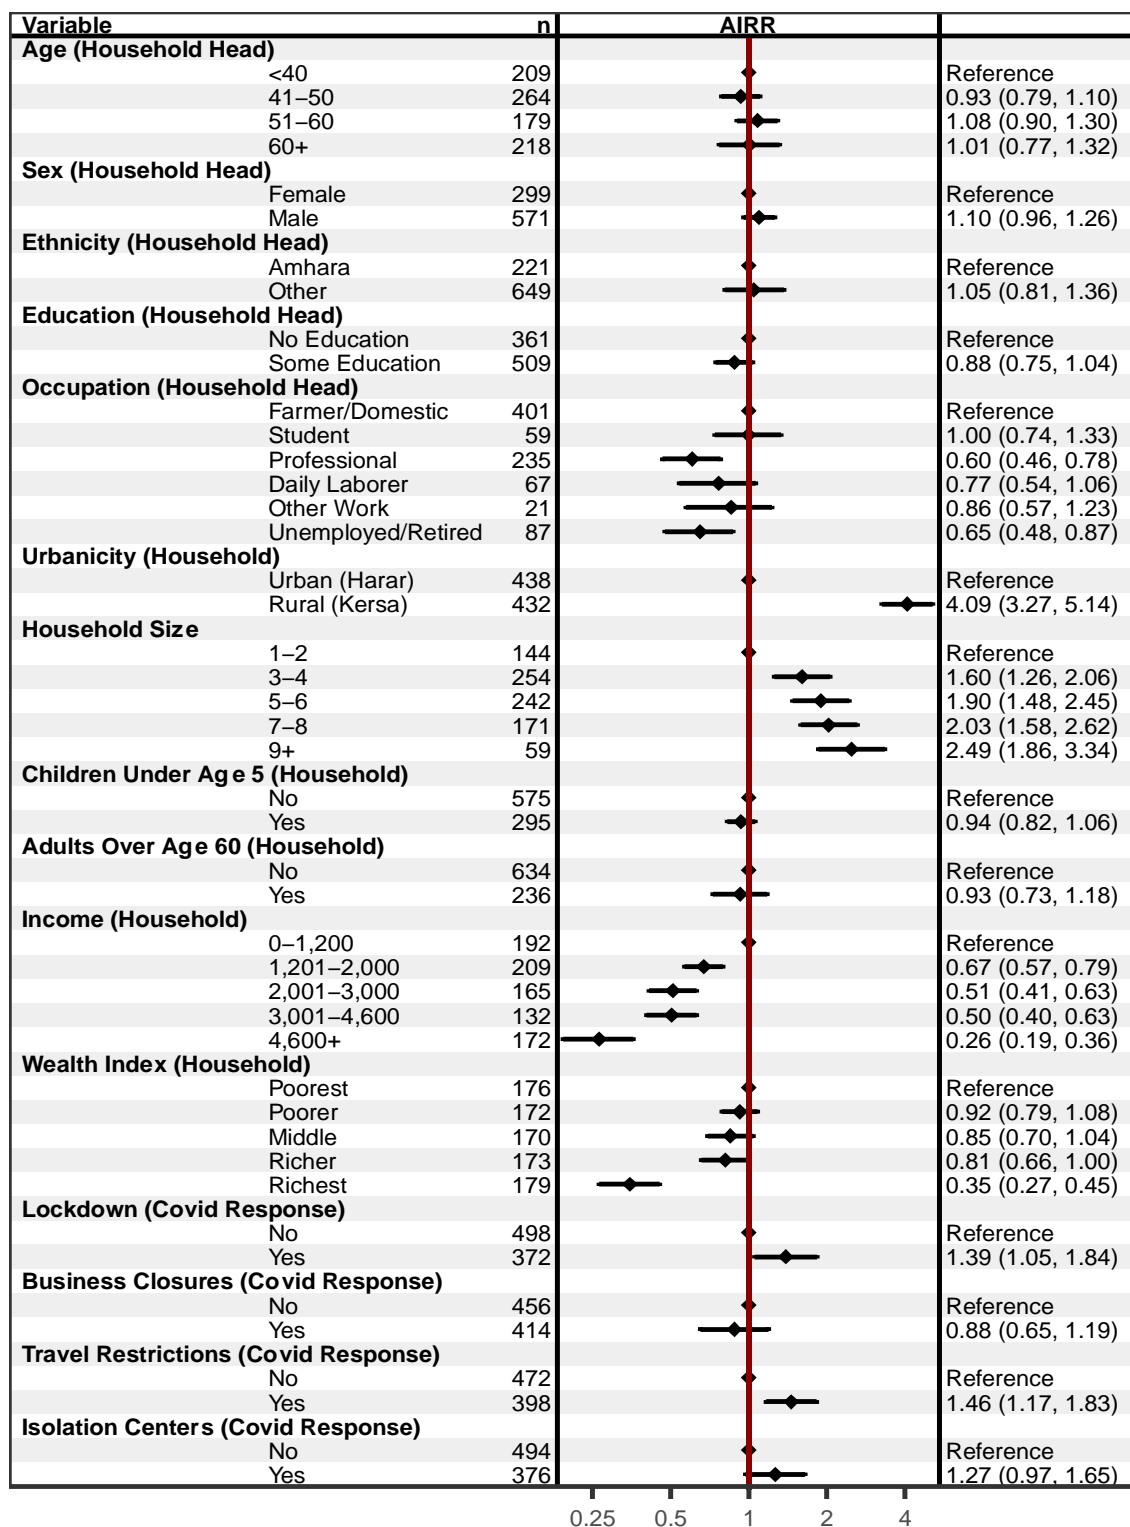

255  
256  
257  
258  
259  
260

Figure 5. Adjusted Associations with *Household Disruptions* presented as Adjusted Incidence Rate Ratios (AIRR). The forest plot presents AIRRs with 95% confidence intervals from a multivariate quasi-Poisson regression model. The AIRRs were adjusted for the other variables included in the model. Education and Occupation had 9 missing values; Income had one outlier set to missing. (n=870)

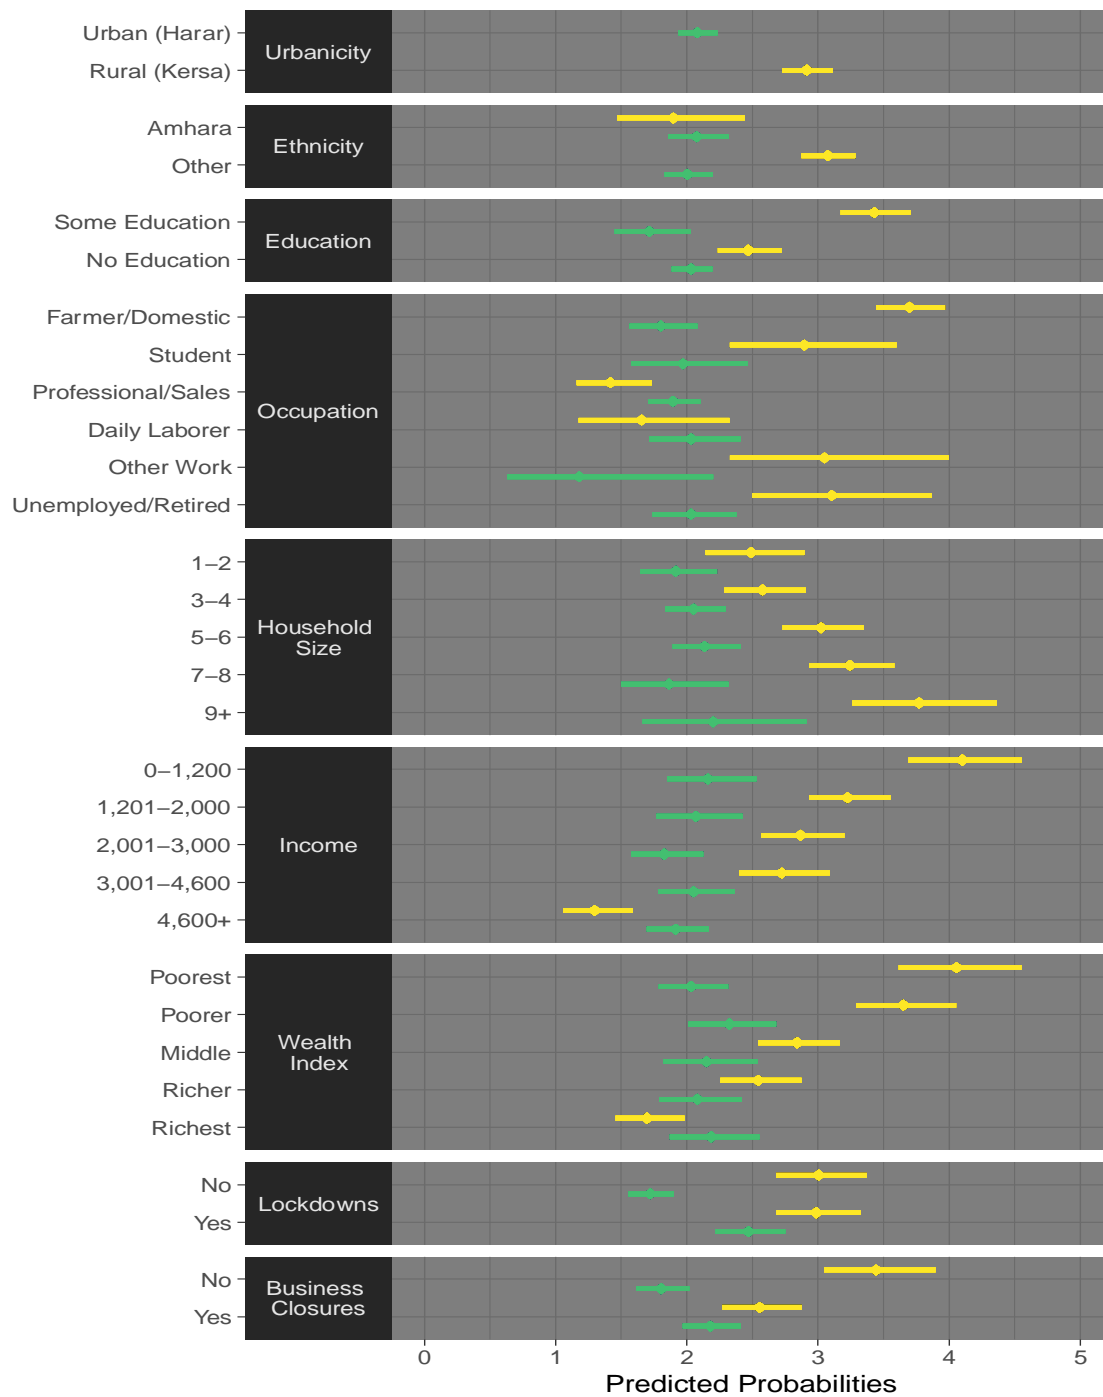

261

262 **Figure 6. Evaluating Effect Modification between Urbanicity and other Factors Associated with**  
 263 ***Household Hardships***. The figure presents a facet grid of predicted probabilities from multiple analytic  
 264 models. The top facet presents the predicted probabilities for household residence in an urban (rep-  
 265 resented in green) vs. rural (represented in yellow) area, holding all other variables at their mean, to  
 266 establish the baseline probabilities for households living in either of the two communities. The proba-  
 267 bilities for this baseline were estimated using the results from the model presented in Figure 5. The  
 268 remaining facets present predicted probabilities estimated from models that included interaction  
 269 terms between urbanicity and other variables associated with *Household Hardships* while holding all  
 270 adjusting variables at their mean.

271 **3.2. Factors Associated with Household Responses to Hardships**

272 The most common household response to experiencing at least once hardship during the pandemic  
 273 was reducing food consumption, which was reported by 24.4% of affected households (see Figure 7).  
 274 Other common responses included selling household assets (21.4%), seeking means to generate addi-  
 275 tional income (20.5%), seeking help from family or friends (14.0%), and borrowing from family or  
 276 friends (10.6%).

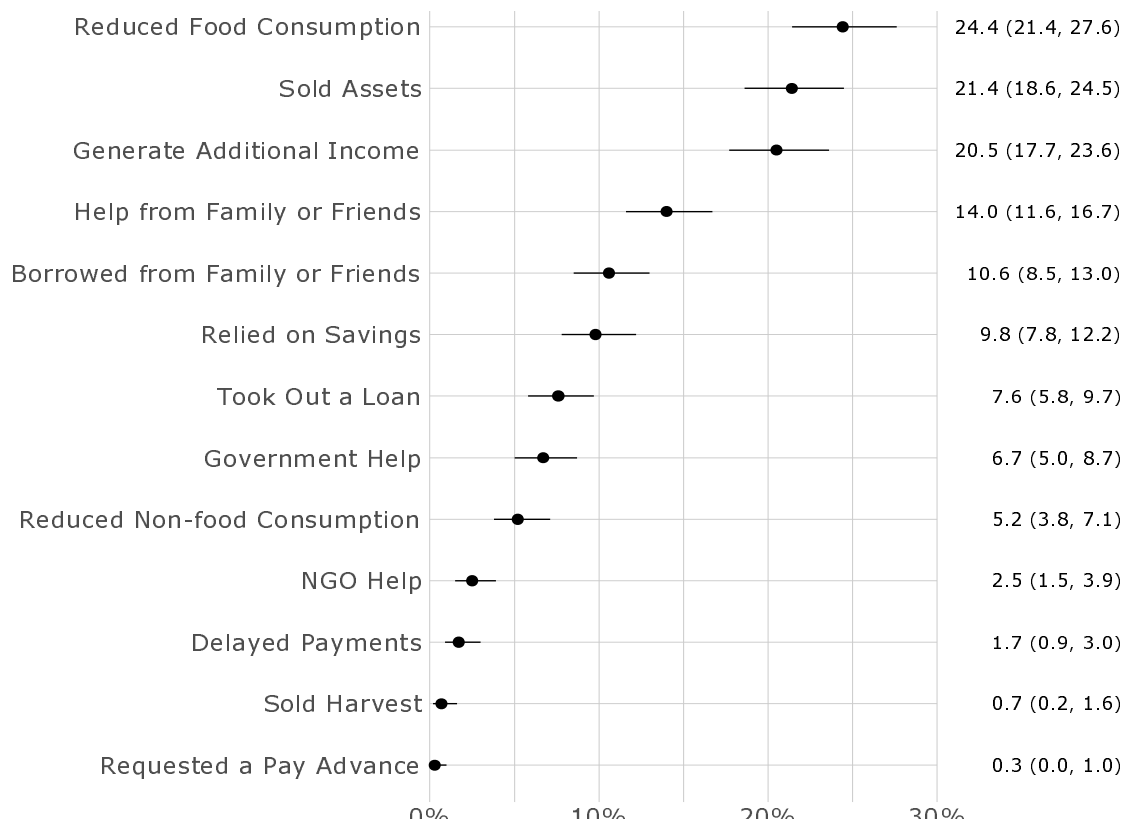

277  
 278 **Figure 7. Percentage of Households that Experienced a Given Hardship during the COVID-19**  
 279 **Pandemic (n = 766).**

280 Comprehensive results for the analyses examining factors associated with household responses to  
 281 pandemic related hardships are presented in Figures A1 – A5 (see Appendix C). After adjusting for  
 282 other variables, including other potential hardships, households that had a member lose their job were  
 283 more likely to report reducing food consumption (AOR = 1.75, 95% CI [1.06, 2.92]); selling assets (AOR  
 284 = 3.19, 95% CI [1.30, 8.41]); seeking to generate additional income (AOR = 2.82, 95% CI [1.55, 5.25]);  
 285 seeking help from family and friends (AOR = 2.20, 95% CI [1.28, 3.83]); and borrowing from family or  
 286 friends (AOR = 5.80, 95% CI [2.61, 13.82]). Households that observed increases in the costs of business  
 287 or farming inputs were more likely to report reducing food consumption (AOR = 2.77, 95% CI [1.51,  
 288 5.20]); selling assets (AOR = 9.24, 95% CI [3.82, 23.96]); seeking help from family and friends (AOR =  
 289 3.45, 95% CI [1.80, 6.82]); and borrowing from family or friends (AOR = 5.54, 95% CI [2.30, 14.06]).  
 290 Observing increased food prices was associated with households selling assets (AOR = 2.36, 95% CI  
 291 [1.12, 4.96]). Households that had a member close their business during the pandemic were less likely  
 292 to report selling assets (AOR = 0.08, 95% CI [0.02, 0.29]). Households that experienced farming dis-  
 293 ruptions were more likely to report seeking to generate additional income (AOR = 24.79, 95% CI [7.26,  
 294 97.71]). Households residing in a rural vs. an urban area were more likely to use all of the measured  
 295 strategies to mitigate experiencing hardships associated with the pandemic—these associations were  
 296 robust to adjusting for other variables.

---

#### 297 4. Discussion

298 In this study, we examined the prevalence of household hardships during the COVID-19 pandemic in  
299 a rural and an urban community in Eastern Ethiopia. We further examined demographic, economic,  
300 and social characteristic associated with these hardships as well as strategies households used to mit-  
301 igate the severity of these hardships. Almost 90% of households reported experiencing at least one  
302 hardship since the onset of the pandemic; 75% of households reported experiencing at least 4 distinct  
303 hardships. Risk factors for experiencing these hardships included inequalities across demographic,  
304 economic, and social characteristics, but also place inequalities. Households that were already strug-  
305 gling prior to the onset of the pandemic were at greatest risk for experiencing additional hard-  
306 ships—residing in a rural area magnified the strength of the associations for several household level  
307 risk factors.

308 Households were more likely to report hardships if the head of household had no education or  
309 worked as a farmer or in a domestic/subsistence occupation. Households were also more likely to re-  
310 port experiencing hardships if they resided in a rural vs. an urban area, had a larger number of  
311 household members, had less monthly income, and were poorer compared to other households in the  
312 community. The pattern of association for both monthly income and household wealth is suggestive of  
313 a dose response; households with less wealth and less monthly income were at significantly higher  
314 risk for experiencing hardships. These associations are consistent with risk factors reported in studies  
315 from other resource limited countries and early stage research from Ethiopia.[6,10-13,18] Community  
316 responses to the pandemic associated with hardships included lockdowns and travel restrictions;  
317 business closures were only associated with experiencing hardships for households residing in an  
318 urban area. Future interventions that seek to mitigate negative consequences associated with pan-  
319 demic mitigation efforts should anticipate these characteristics as important risk factors and target  
320 interventions to aid vulnerable groups.

321 Loss of employment for a household member and observation of increasing costs of business or  
322 farming inputs were both associated with the broadest combination of household responses to pan-  
323 demic hardships. Patterns of association between demographic, economic, and social characteristics  
324 and household response strategies were inconsistent; however, compared to urban households, rural  
325 households were more likely to implement each of the measured response strategies, even after ad-  
326 justing for demographic, economic, and social characteristics as well as the various pandemic related  
327 hardships.

328 The empirical findings from this study are not generalizable outside of the communities under study;  
329 while we acknowledge this limitation, we note that it is common to studies using HDSS data.[17] As an  
330 observational study, other potential limitations include unmeasured variable bias (for example, having  
331 data on household participation in Ethiopia's Productive Safety Net Program (PSNP) may have helped  
332 contextualize our results) or recall bias due to the extended length of time considered in the study (i.e.,  
333 some respondents may have forgotten hardships that occurred closer to onset of the pandemic). As a  
334 cross-sectional study, we cannot draw causal inferences. Results from other studies suggest hardships  
335 associated with the COVID-19 pandemic are temporary.[7] Looking forward, scholars should collect  
336 and analyze longitudinal data to evaluate hardship events over time. In the context of demographic  
337 surveillance systems, follow-up data collection using the same survey instrument is easy to attach to  
338 subsequent rounds of data collection already being fielded. A further limitation, common to studies  
339 involving humanitarian crises, is that we are unable to differentiate between the effects of the pan-  
340 demic and that of the political tension in the northern region of Ethiopia.[27] However, it is notewor-  
341 thy that the northern region is more than 400 km away from the study communities.

#### 342 5. Conclusions

343 Households living in the rural area of Kersa were at greater risk of experiencing a variety of hardships  
344 during the COVID-19 pandemic, even after adjusting for demographic, economic, and social risk fac-

345 tors. Moreover, the strength of the associations between household hardships and demographic, eco-  
346 nomic, and social risk factors was greater for households residing in the rural area of Kersa compared  
347 to the urban area of Harar. These results suggest an enduring urban vs. rural divide that amplifies the  
348 effects of household level socioeconomic inequalities. Interventions seeking to ameliorate conse-  
349 quences of lockdowns and other efforts implemented to stem disease spread should seek to address  
350 place inequalities associated with rural areas as distinct from, but also interacting with, household  
351 level risk factors. These finding may inform future policies and practices aiming to mitigate negative  
352 consequences of COVID-19 and future disease outbreaks.

---

353 **Supplementary Materials:** The following supporting information can be downloaded at: [www.mdpi.com/xxx/s1](http://www.mdpi.com/xxx/s1),  
354 Figure S1: title; Table S1: title; Video S1: title.

355 **Author Contributions:** For research articles with several authors, a short paragraph specifying their individual  
356 contributions must be provided. The following statements should be used “Conceptualization, J.M., S.C., N.A.,  
357 and M.D.; methodology, J.M., S.C., N.A., and M.D.; software, J.M.; validation, J.M., N.A., and M.D.; formal anal-  
358 ysis, J.M. and Z.M.; investigation, J.M., Z.M., S.C., N.A., T.G., G.M., and M.D.; resources, J.M., Z.M., C.M., S.C.,  
359 N.A., T.G., G.M., and M.D.; data curation, N.A., T.G., G.M., and M.D.; writing—original draft preparation, J.M.;  
360 writing—review and editing, J.M., Z.M., C.M., S.C., N.A., and M.D.; visualization, J.M. and Z.M.; supervision,  
361 C.M., S.C., and N.A.; project administration, J.M. and M.D.; funding acquisition, C.M. All authors have read and  
362 agreed to the published version of the manuscript.”

363 **Funding:** This work was supported, in whole or in part, by grant OPP1126780 from the Bill & Melinda Gates  
364 Foundation to Dr Cynthia Whitney. Under the grant conditions of the Foundation, a Creative Commons Attribu-  
365 tion 4.0 Generic License has already been assigned to the Author Accepted Manuscript version that might arise  
366 from this submission.

367 **Institutional Review Board Statement:** This study was conducted according to the guidelines laid down in the  
368 Declaration of Helsinki and all procedures involving research study participants were approved by the human  
369 subjects ethical committee of Haramaya University.

370 **Informed Consent Statement:** Informed consent was obtained from all subjects involved in the study.

371 **Data Availability Statement:** The data presented in this study are available on request from the corresponding  
372 author. The data are not publicly available due to restrictions.

373 **Acknowledgments:** In this section, you can acknowledge any support given which is not covered by the author  
374 contribution or funding sections. This may include administrative and technical support, or donations in kind  
375 (e.g., materials used for experiments).

376 **Conflicts of Interest:** None.

377 **Disclaimers:** The findings and conclusions in this report are those of the authors and do not necessarily represent  
378 the views of the US Centers for Disease Control and Prevention.

---

379 **Appendix A**

380

| Variable                 | Factor Pattern |
|--------------------------|----------------|
| Job loss                 | 0.60           |
| Nonfarm business closure | 0.87           |
| Farm disruption          | 0.79           |
| Livestock disruption     | 0.92           |
| Fishing disruption       | 0.80           |
| Output deflation         | 0.87           |
| <i>Eigenvalue</i>        | 4.00           |
| Explained variance       | 40%            |



381 **Appendix B**

382 **Wealth Index Generation**

383 A wealth index was generated based on a collection of assets and construction materials for the main  
384 dwelling of a given household. To generate the index, we followed recommendations from the DHS  
385 and the World Food Programme (WFP) that summarize steps for calculating an asset based wealth  
386 index,[42-44] including coding instructions for Stata,[45] and an adaptation of this coding process im-  
387 plemented in R.[29,46] Using these documents to guide us, we generated our wealth index by identi-  
388 fying a list of household assets for inclusion in our index computation, recoded all household assets  
389 into dichotomous variables; recoded dwelling materials into improved vs. non-improved dichoto-  
390 mous variables; divided our sample into rural and urban subsamples and assessed level of represen-  
391 tation of a given variable within the rural and urban subsamples (per WFP recommendations, a given  
392 variable was included in further calculations if percent ownership ranged between 5 and 95 percent);  
393 employed principal components analysis with varimax rotation to calculate component scores for  
394 those households living in either rural or urban areas, which explained 45% of the variation in both  
395 subsamples; extracted and combined the PCA scores of the first component from the urban and rural  
396 subsamples; and finally organized the scores into wealth quintiles to generate a composite asset index.  
397 The resulting wealth quintiles are presented in Figure (4). The distribution of assets owned by  
398 households as well as the materials used for constructing a household's residence are presented as  
399 percentages in Figure (5).

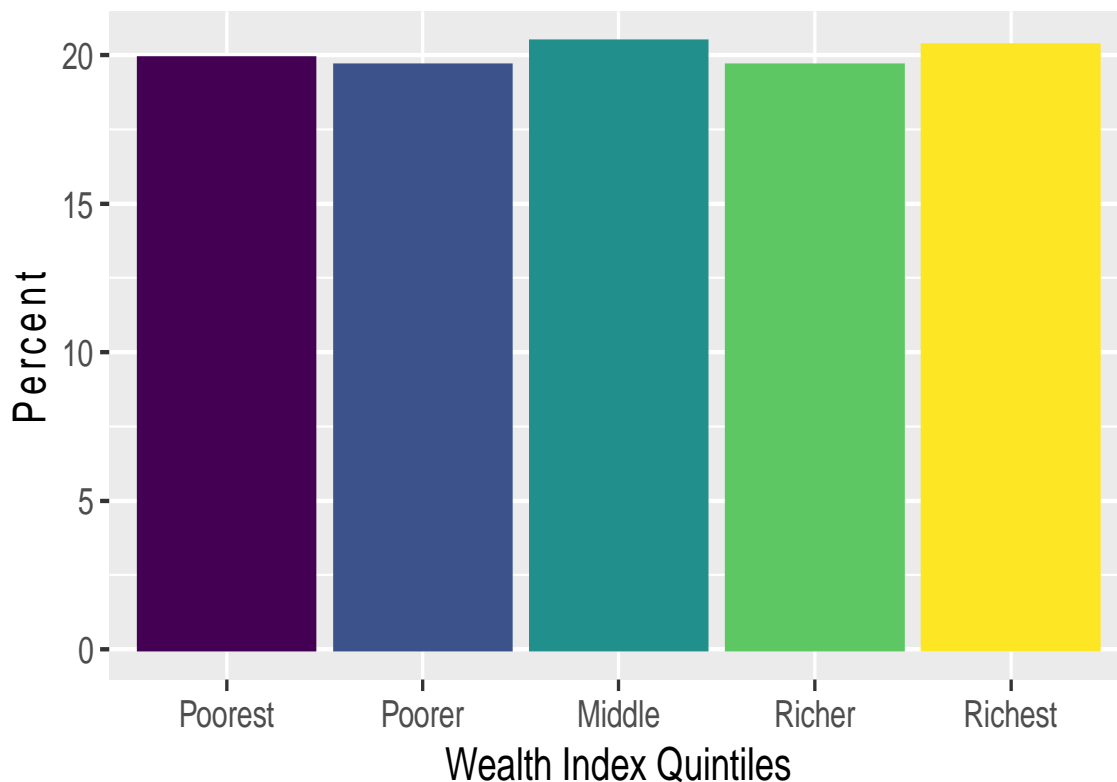

400

401

Figure 7. Household Wealth Index Distribution

402

403

404

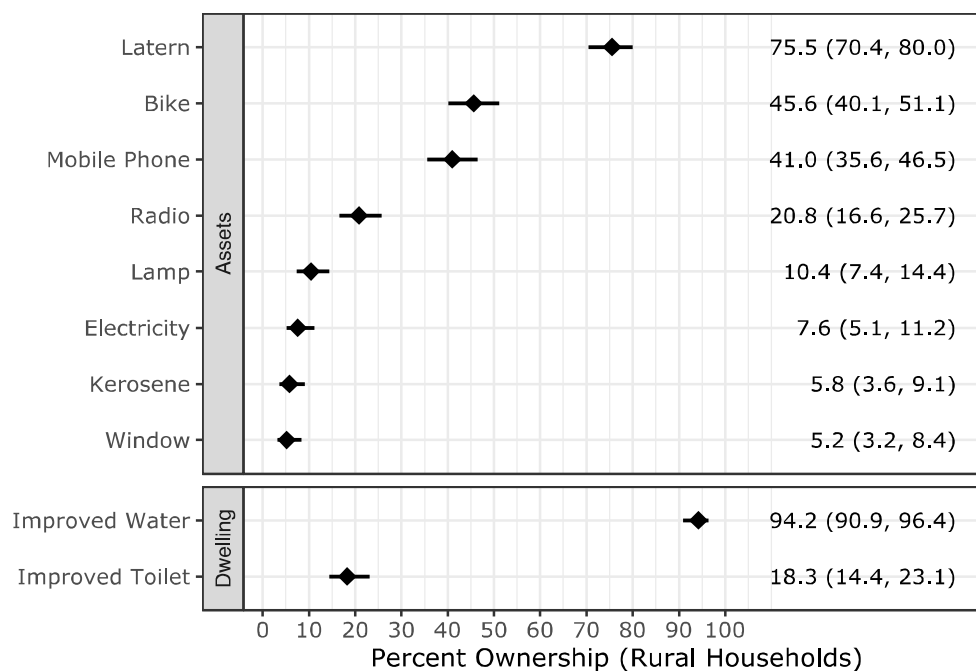

405

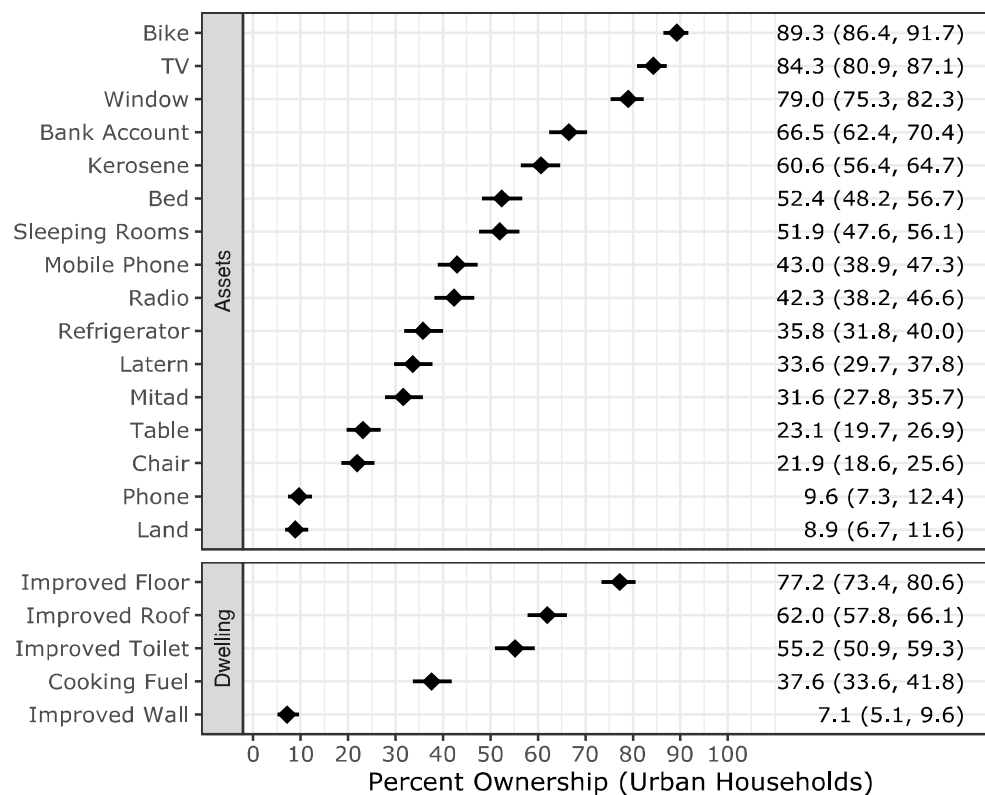

406

407 **Figure 8.** Households Asset Ownership and Dwelling Construction Materials included in Wealth In-  
 408 dex

409 Appendix C

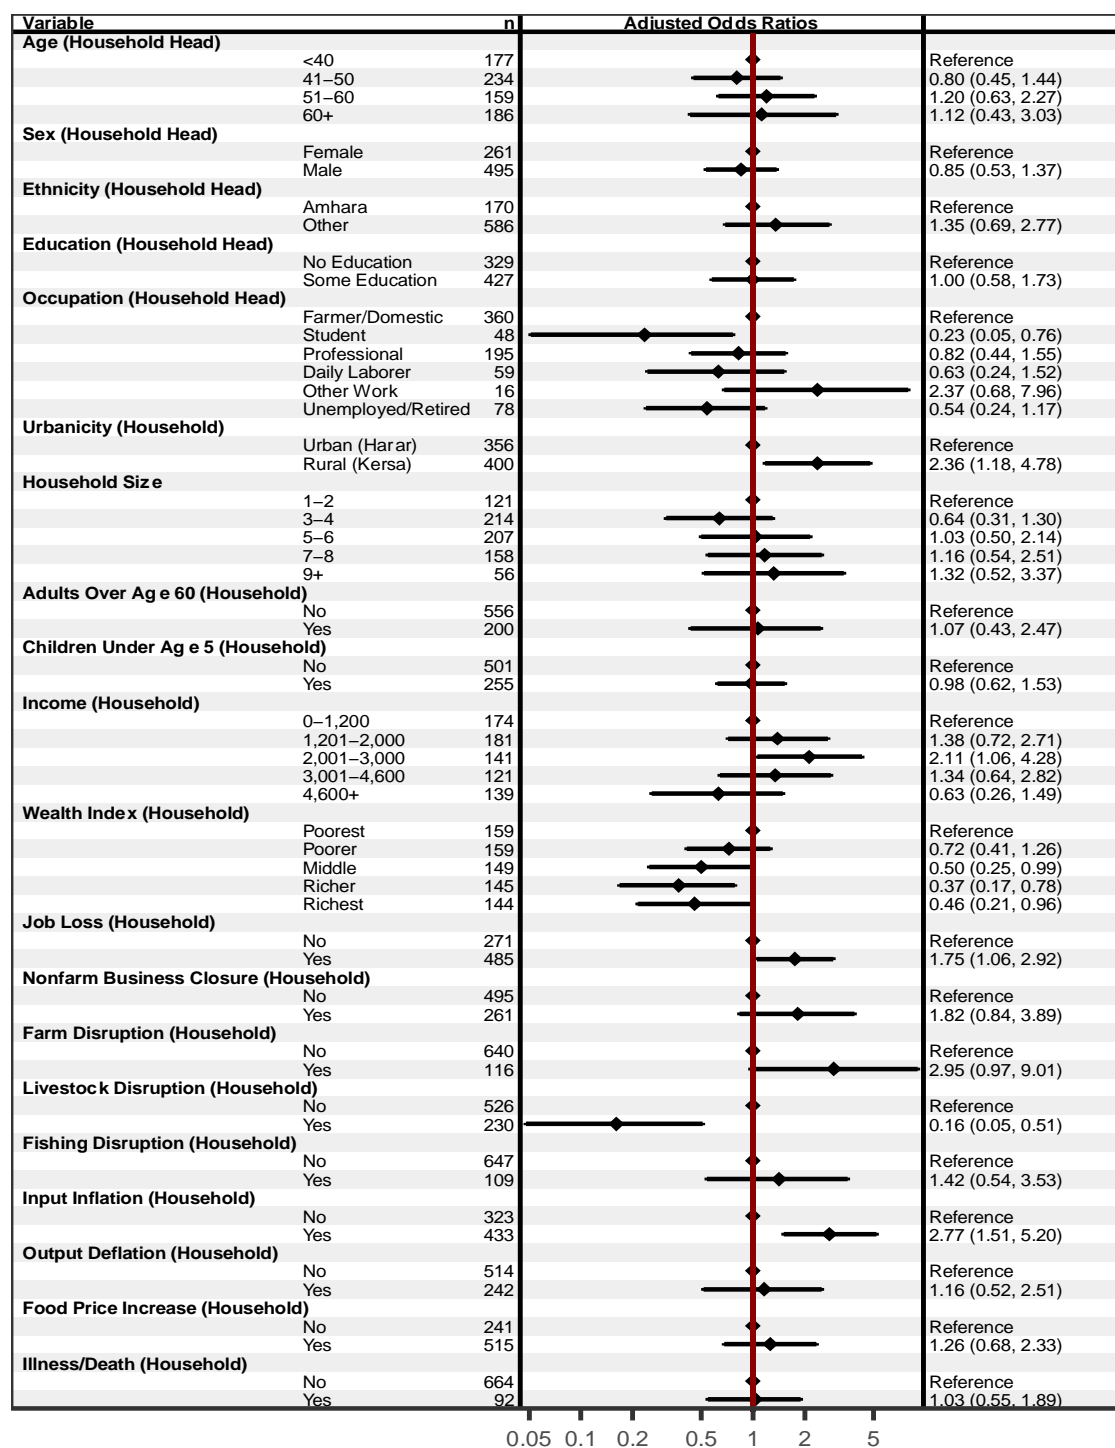

410

411 Figure A1. Adjusted Associations with *Reduced Food Consumption* presented as Adjusted Odds  
 412 Ratios (AOR). The forest plot presents AORs with 95% confidence intervals from an adjusted logistic  
 413 regression model. The AORs were adjusted for the other variables included in the model. Education  
 414 and Occupation had 9 missing values; Income had one outlier set to missing. (n=756)

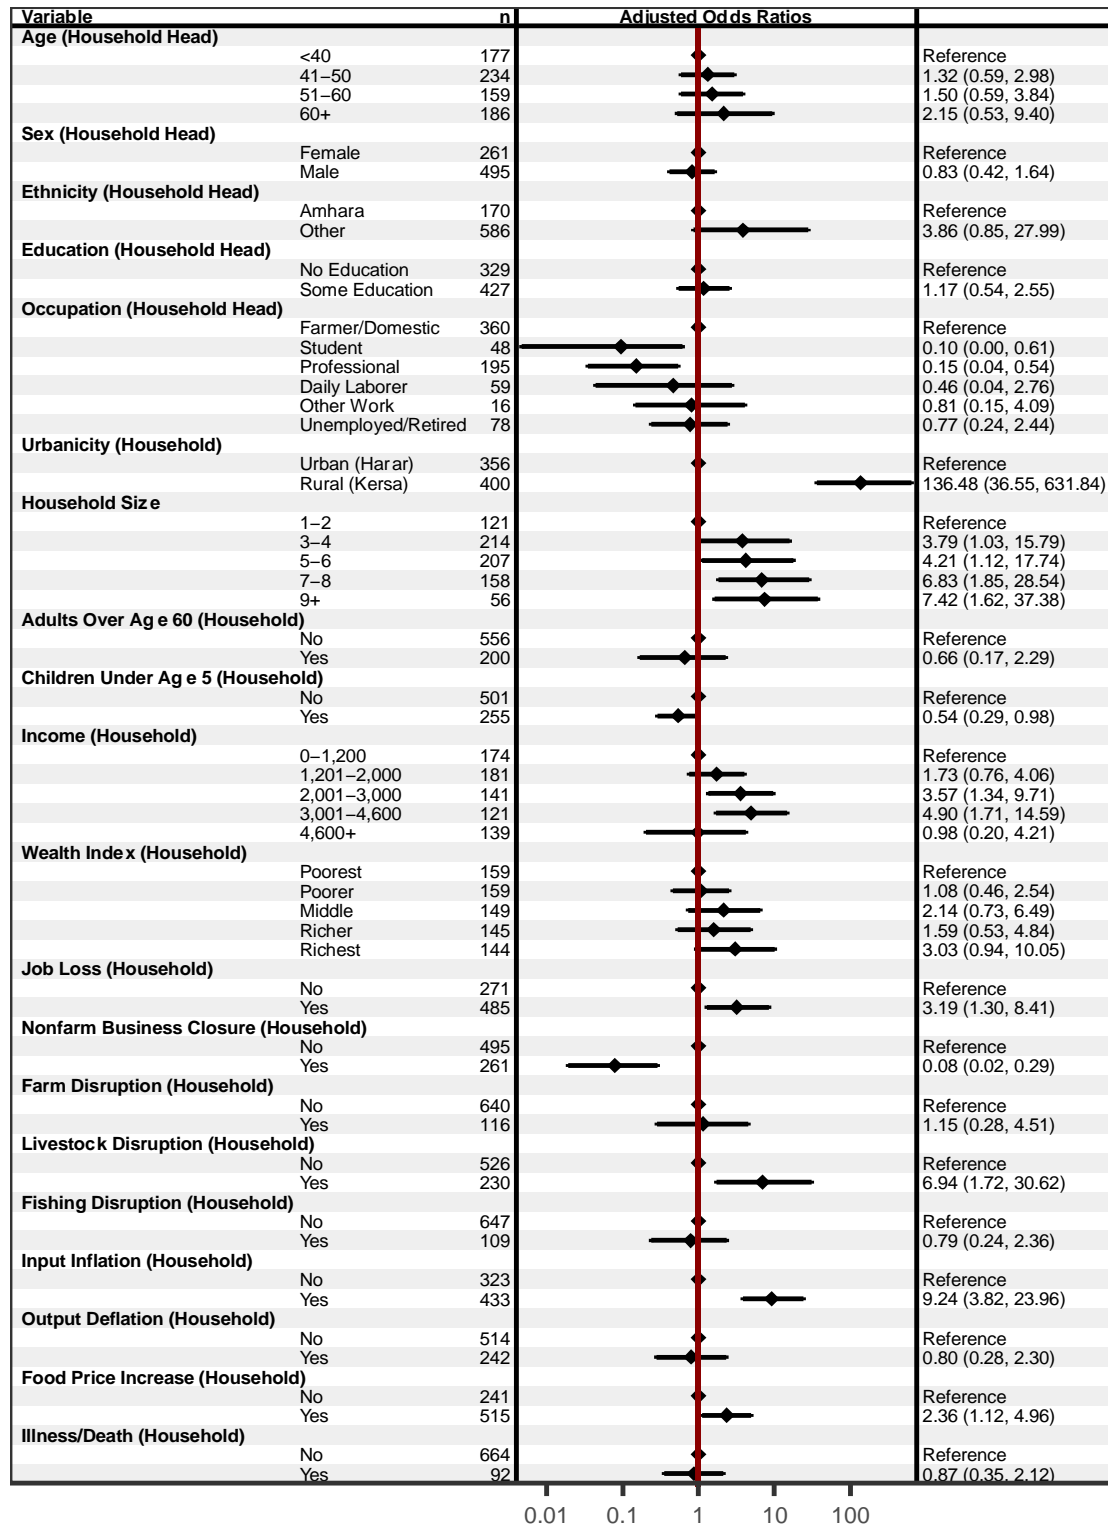

415

416

417

418

419

Figure A2. Adjusted Associations with *Sold Assets* presented as Adjusted Odds Ratios (AOR). The forest plot presents AORs with 95% confidence intervals from an adjusted logistic regression model. The AORs were adjusted for the other variables included in the model. Education and Occupation had 9 missing values; Income had one outlier set to missing. (n=756)

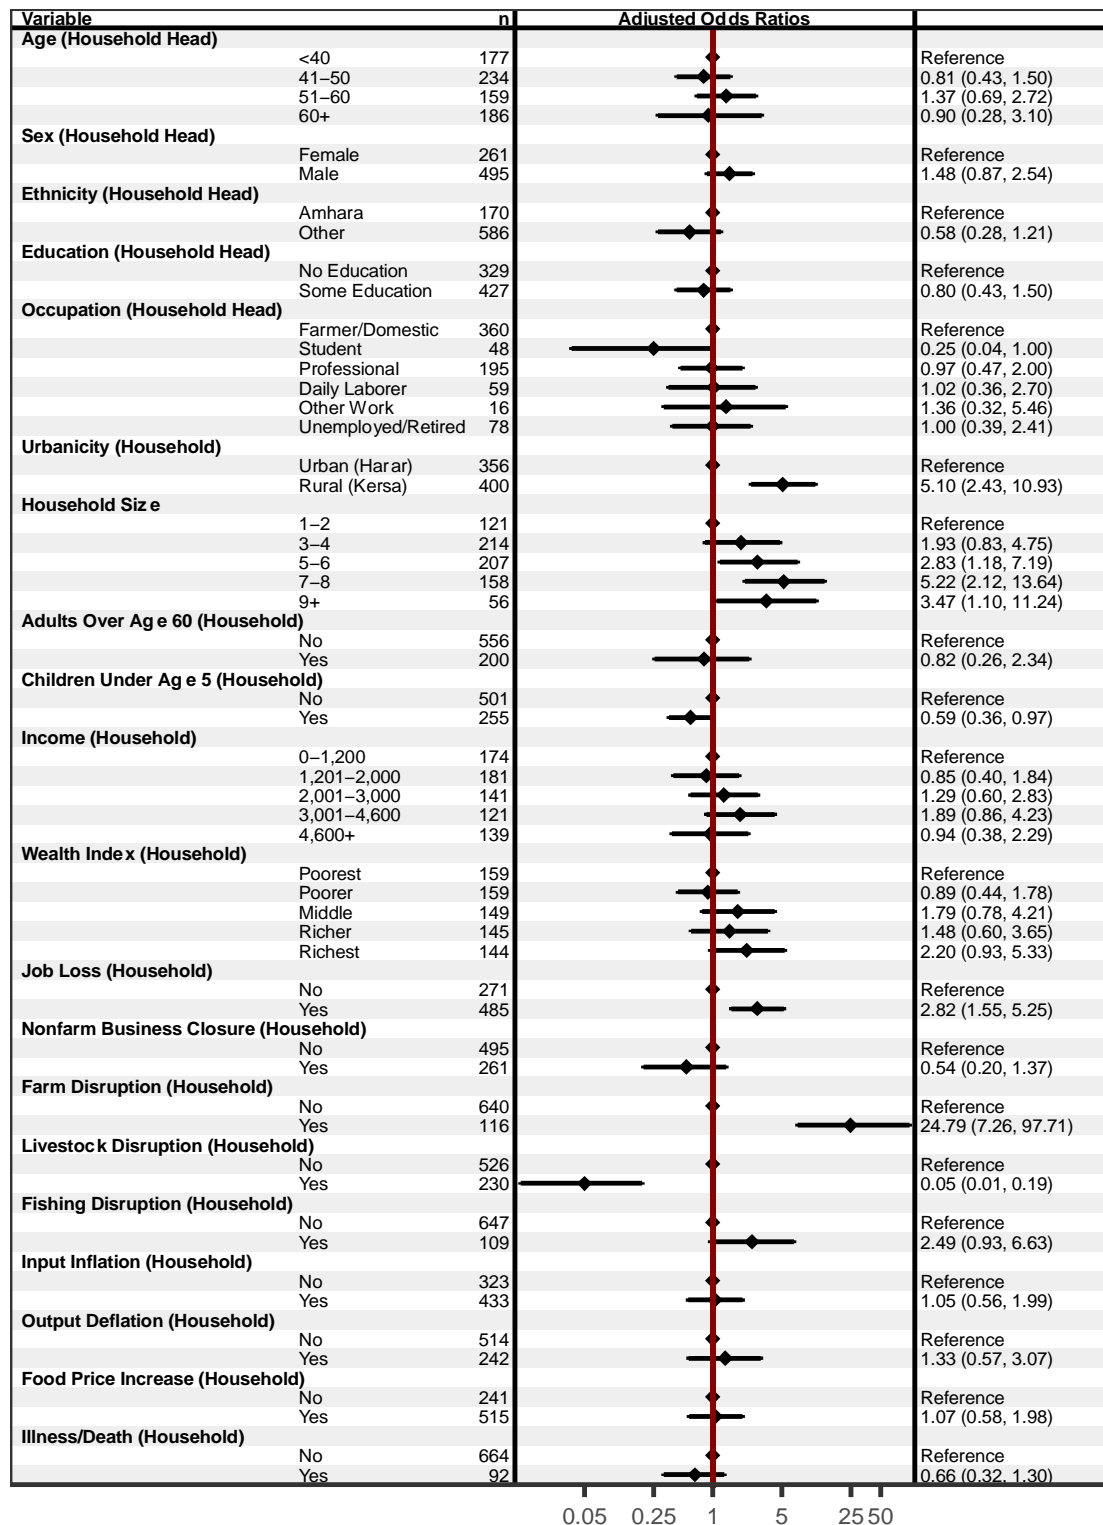

420

421 Figure A3. Adjusted Associations with *Sought to Generate Additional Income* presented as Ad-  
 422 justed Odds Ratios (AOR). The forest plot presents AORs with 95% confidence intervals from an ad-  
 423 justed logistic regression model. The AORs were adjusted for the other variables included in the  
 424 model. Education and Occupation had 9 missing values; Income had one outlier set to missing. (n=756)

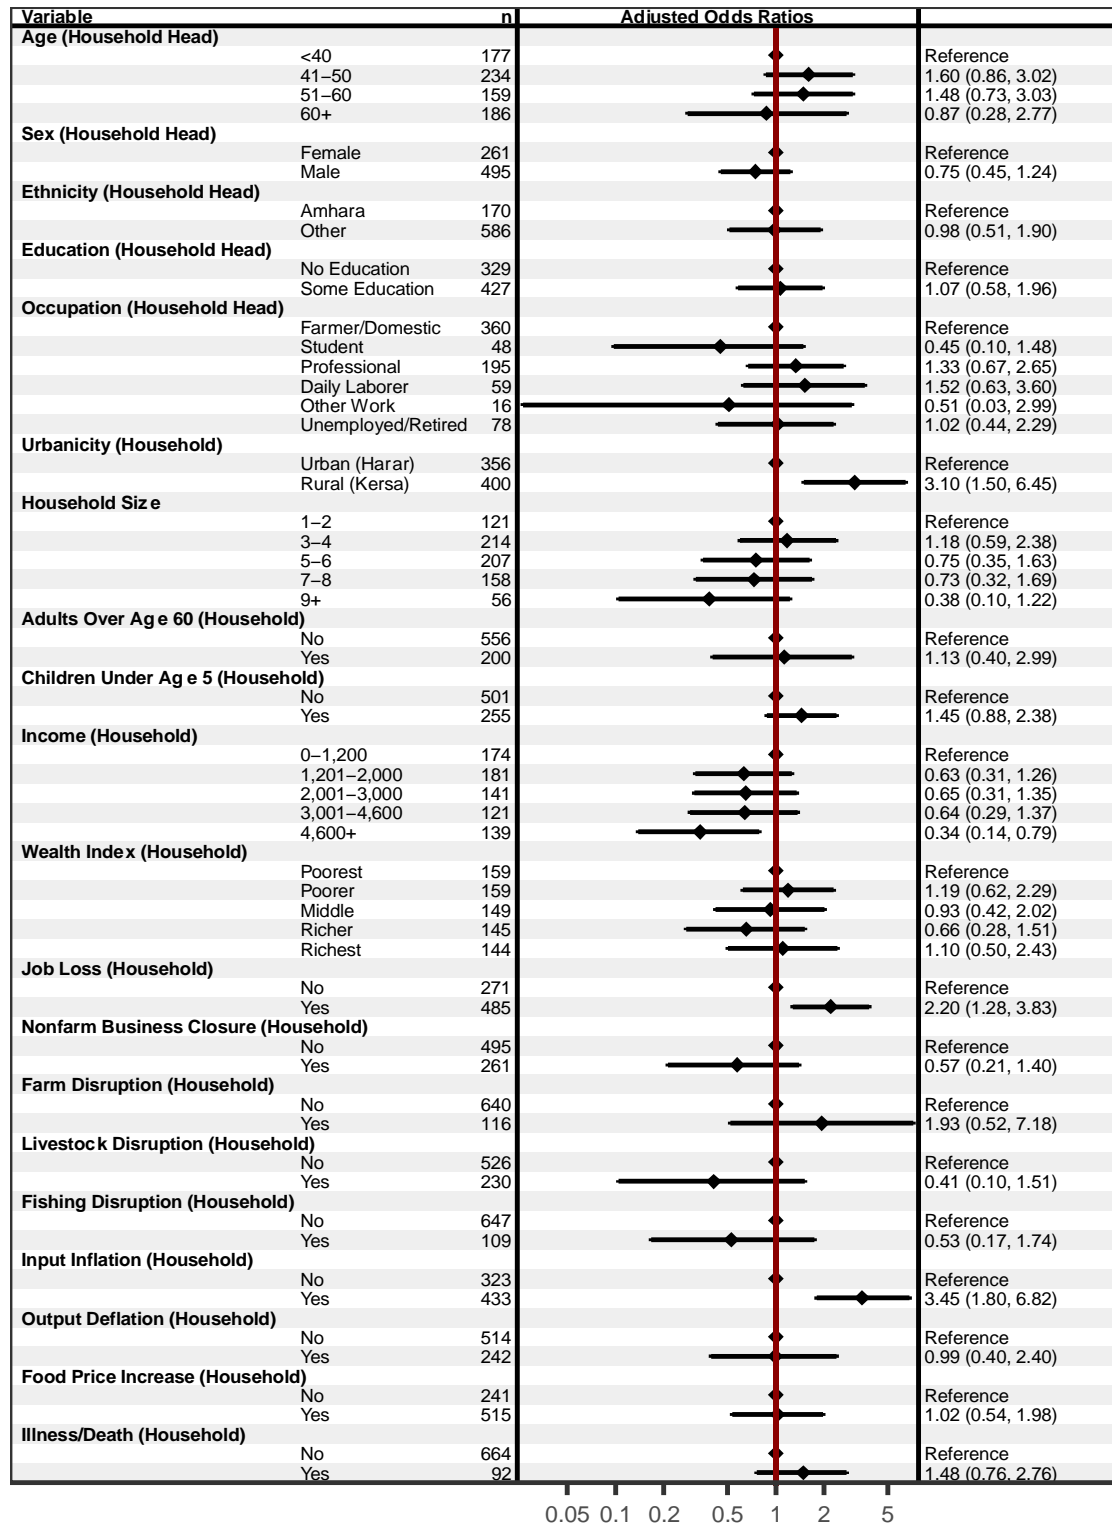

425

426

427

428

429

Figure A4. Adjusted Associations with *Sought Help from Family or Friends* presented as Adjusted Odds Ratios (AOR). The forest plot presents AORs with 95% confidence intervals from an adjusted logistic regression model. The AORs were adjusted for the other variables included in the model. Education and Occupation had 9 missing values; Income had one outlier set to missing. (n=756)

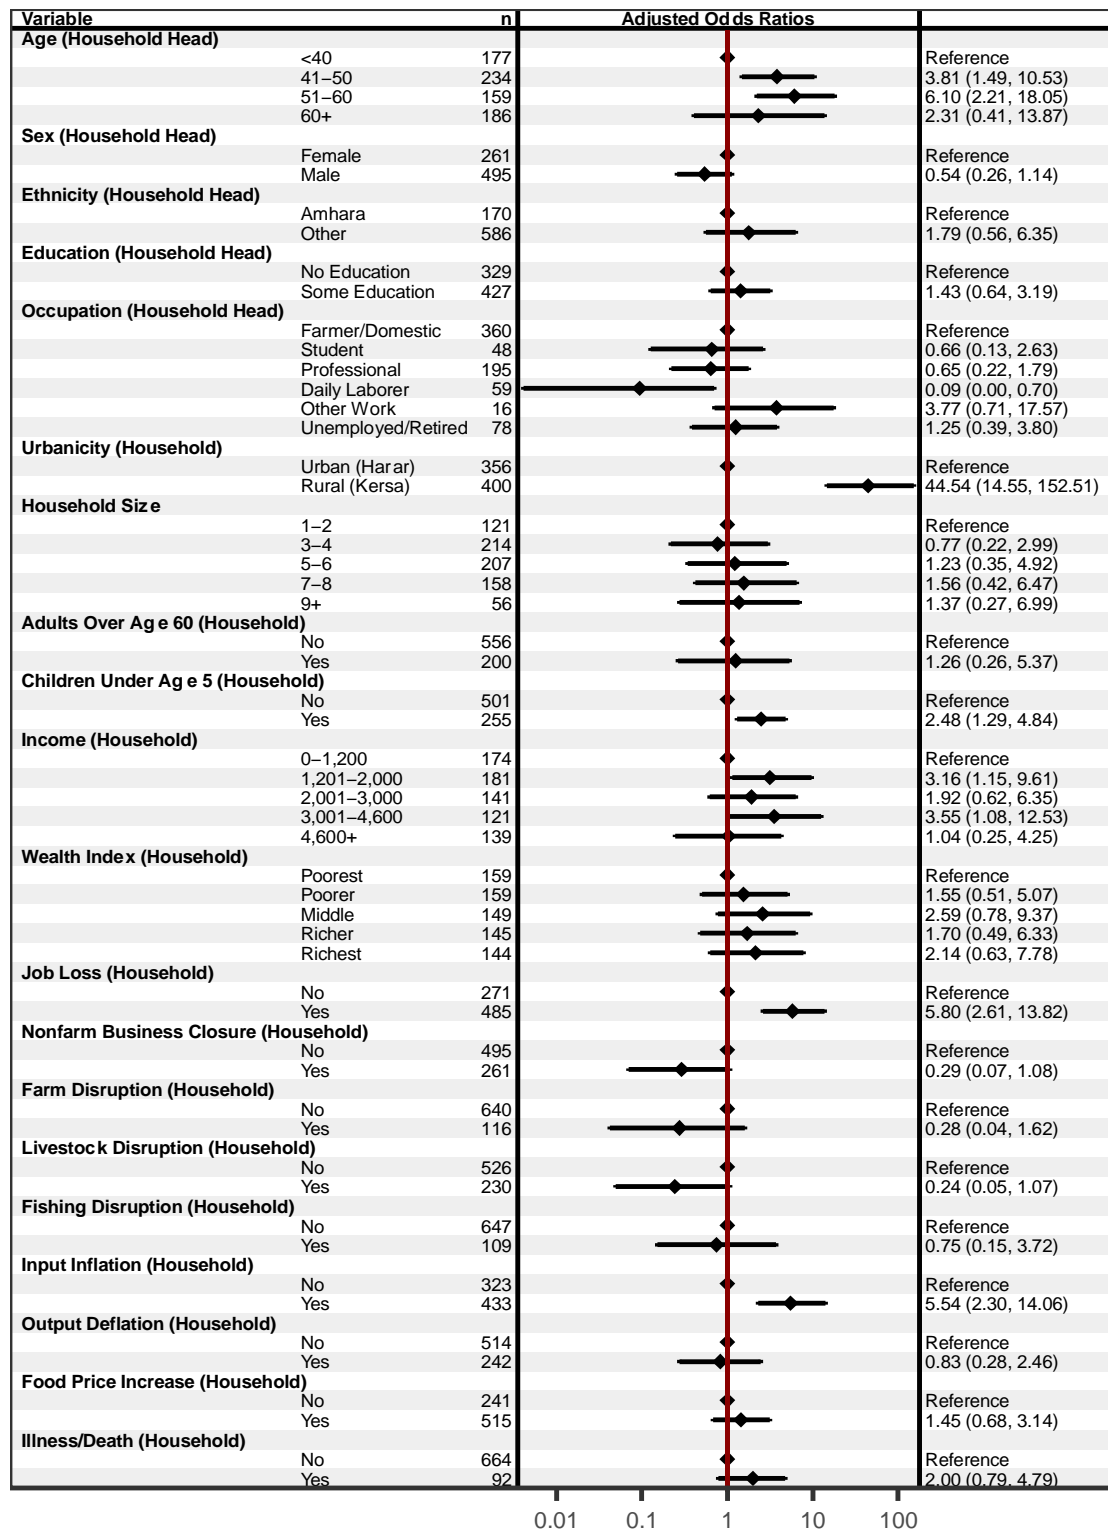

430

431 Figure A5. Adjusted Associations with *Borrowed from Family or Friends* presented as Adjusted  
 432 Odds Ratios (AOR). The forest plot presents AORs with 95% confidence intervals from an adjusted  
 433 logistic regression model. The AORs were adjusted for the other variables included in the model. Ed-  
 434 ucation and Occupation had 9 missing values; Income had one outlier set to missing. (n=756)

---

435 **References**

- 436 1. Wang, H.; Paulson, K.R.; Pease, S.A.; Watson, S.; Comfort, H.; Zheng, P.; Aravkin, A.Y.; Bisignano, C.;  
437 Barber, R.M.; Alam, T. Estimating excess mortality due to the COVID-19 pandemic: a systematic  
438 analysis of COVID-19-related mortality, 2020–21. *The Lancet* **2022**.
- 439 2. Baldwin, R.E.; Weder, B. *Mitigating the COVID Economic Crisis: Act Fast and Do Whatever It Takes*; CEPR  
440 press: 2020.
- 441 3. Picchioni, F.; Goulao, L.F.; Roberfroid, D. The Impact of COVID-19 on Diet Quality, Food Security and  
442 Nutrition in Low and Middle Income Countries: A Systematic Review of the Evidence. *Clinical Nutrition*  
443 **2021**.
- 444 4. Osendarp, S.; Akuoku, J.K.; Black, R.E.; Headey, D.; Ruel, M.; Scott, N.; Shekar, M.; Walker, N.; Flory, A.;  
445 Haddad, L. The COVID-19 Crisis Will Exacerbate Maternal and Child Undernutrition and Child  
446 Mortality in Low-and Middle-Income Countries. *Nature Food* **2021**, *2*, 476-484.
- 447 5. Akseer, N.; Kandru, G.; Keats, E.C.; Bhutta, Z.A. COVID-19 Pandemic and Mitigation Strategies:  
448 Implications for Maternal and Child Health and Nutrition. *The American Journal of Clinical Nutrition* **2020**,  
449 *112*, 251-256, doi:10.1093/ajcn/nqaa171.
- 450 6. Onyango, E.O.; Crush, J.; Owuor, S. Preparing for COVID-19: Household Food Insecurity and  
451 Vulnerability to Shocks in Nairobi, Kenya. *PLoS ONE* **2021**, *16*, e0259139.
- 452 7. Hirvonen, K.; de Brauw, A.; Abate, G.T. Food Consumption and Food Security During the COVID-19  
453 Pandemic in Addis Ababa. *American Journal of Agricultural Economics* **2021**, *103*, 772-789.
- 454 8. Ayanlade, A.; Radeny, M. COVID-19 and Food Security in Sub-Saharan Africa: implications of  
455 Lockdown during Agricultural Planting Seasons. *npj Science of Food* **2020**, *4*, 1-6.
- 456 9. Hirvonen, K.; Abate, G.T.; de Brauw, A. Survey Suggests Rising Risk of Food and Nutrition Insecurity  
457 in Addis Ababa, Ethiopia, as COVID-19 Restrictions Continue. *IFPRI book chapters* **2020**, 46-49.
- 458 10. Chitiga, M.; Henseler, M.; Mabugu, R.E.; Maisonnave, H. How COVID-19 pandemic worsens the  
459 economic situation of women in South Africa. *The European Journal of Development Research* **2021**, 1-18.
- 460 11. Fikire, A.H.; Zegeye, M.B. Determinants of Rural Household Food Security Status in North Shewa Zone,  
461 Amhara Region, Ethiopia. *The Scientific World Journal* **2022**, 2022.
- 462 12. Manfrinato, C.V.; Marino, A.; Condé, V.F.; Maria do Carmo, P.F.; Stedefeldt, E.; Tomita, L.Y. High  
463 prevalence of food insecurity, the adverse impact of COVID-19 in Brazilian favela. *Public health nutrition*  
464 **2021**, *24*, 1210-1215.
- 465 13. Banna, M.; Al, H.; Sayeed, A.; Kundu, S.; Kagstrom, A.; Sultana, M.; Begum, M.R.; Khan, M.S.I. Factors  
466 associated with household food insecurity and dietary diversity among day laborers amid the  
467 COVID-19 pandemic in Bangladesh. *BMC nutrition* **2022**, *8*, 1-11.
- 468 14. Robertson, T.; Carter, E.D.; Chou, V.B.; Stegmuller, A.R.; Jackson, B.D.; Tam, Y.; Sawadogo-Lewis, T.;  
469 Walker, N. Early Estimates of the Indirect Effects of the COVID-19 Pandemic on Maternal and Child  
470 Mortality in Low-Income and Middle-Income Countries: A Modeling Study. *The Lancet Global Health*  
471 **2020**, *8*, e901-e908.
- 472 15. Chen, J.; Vullikanti, A.; Santos, J.; Venkatramanan, S.; Hoops, S.; Mortveit, H.; Lewis, B.; You, W.;  
473 Eubank, S.; Marathe, M. Epidemiological and Economic Impact of COVID-19 in the US. *Scientific reports*  
474 **2021**, *11*, 1-12.
-



- 
- 475 16. Muir, J.A.; Deresa, M.; Madewell, Z.J.; Getachew, T.; Mengesha, G.; Whitney, C.G.; Assefa, N.;  
476 Cunningham, S.A. Food Insecurity amid COVID-19 Lockdowns: Assessing Sociodemographic  
477 Indicators of Vulnerability in Harar and Kersa, Ethiopia. *medRxiv* **2023**, 2023.2001. 2031.23284545.
- 478 17. Clark, S.; Wakefield, J.; McCormick, T.; Ross, M. Hyak Mortality Monitoring System: Innovative  
479 Sampling and Estimation Methods—Proof of Concept by Simulation. *Global Health, Epidemiology and*  
480 *Genomics* **2018**, *3*.
- 481 18. Goshu, D.; Ferede, T.; Diriba, G.; Ketema, M. *Economic and Welfare Effects of COVID-19 and Responses in*  
482 *Ethiopia: Initial Insights*; Ethiopian Economic Policy Research Institute: 2020.
- 483 19. Shigute, Z.; Mebratie, A.D.; Alemu, G.; Bedi, A. Containing the Spread of COVID-19 in Ethiopia. *Journal*  
484 *of Global Health* **2020**, *10*.
- 485 20. Spielman, S.E.; Tuccillo, J.; Folch, D.C.; Schweikert, A.; Davies, R.; Wood, N.; Tate, E. Evaluating Social  
486 Vulnerability Indicators: Criteria and Their Application to the Social Vulnerability Index. *Natural*  
487 *Hazards* **2020**, *100*, 417-436.
- 488 21. Muir, J.A.; Cope, M.R.; Angeningsih, L.R.; Jackson, J.E.; Brown, R.B. Migration and Mental Health in the  
489 Aftermath of Disaster: Evidence From MT. Merapi, Indonesia. *International journal of environmental*  
490 *research and public health* **2019**, *16*, 2726.
- 491 22. Muir, J.A.; Cope, M.R.; Angeningsih, L.R.; Jackson, J.E. To Move Home or Move On? Investigating the  
492 Impact of Recovery Aid on Migration Status as a Potential Tool for Disaster Risk Reduction in the  
493 Aftermath of Volcanic Eruptions in Merapi, Indonesia. *International Journal of Disaster Risk Reduction*  
494 **2020**, *46*, 101478.
- 495 23. Perry, R.W. What is a Disaster? In *Handbook of Disaster Research*; Springer: 2007; pp. 1-15.
- 496 24. Cutter, S.L.; Barnes, L.; Berry, M.; Burton, C.; Evans, E.; Tate, E.; Webb, J. A place-based model for  
497 understanding community resilience to natural disasters. *Global environmental change* **2008**, *18*, 598-606.
- 498 25. Cutter, S.L.; Boruff, B.J.; Shirley, W.L. Social vulnerability to environmental hazards. In *Hazards*  
499 *vulnerability and environmental justice*; Routledge: 2012; pp. 143-160.
- 500 26. Flanagan, B.E.; Gregory, E.W.; Hallisey, E.J.; Heitgerd, J.L.; Lewis, B. A Social Vulnerability Index for  
501 Disaster Management. *Journal of Homeland Security and Emergency Management* **2011**, *8*.
- 502 27. Muir, J.A. *Societal Shocks as Social Determinants of Health*; The Ohio State University: 2021.
- 503 28. Muir, J.A. *Indicators of Fertility Change in a Developing Nation: Examining the Impact of Motorcycles as a*  
504 *Distance Demolishing Technology on Fertility Change in Rural Indonesia*; Brigham Young University: 2012.
- 505 29. Sanders, S.R.; Muir, J.A.; Brown, R.B. Overcoming Geographic Penalties of Inequality: The Effects of  
506 Distance-Demolishing Technologies on Household Well-Being in Vietnam. *Asian Journal of Social Science*  
507 **2018**, *46*, 260-280.
- 508 30. Gebru, M.; Remans, R.; Brouwer, I.D.; Baye, K.; Melesse, M.B.; Covic, N.; Hattamu, F.; Abay, A.H.;  
509 Hailu, T.; Hirvonen, K. Food systems for healthier diets in Ethiopia: Toward a research agenda. *IFPRI*  
510 *Discussion Paper* **2018**.
- 511 31. Haile, D.; Seyoum, A.; Azmeraw, A. Food and nutrition security impacts of resilience capacity: Evidence  
512 from rural Ethiopia. *Journal of Agriculture and Food Research* **2022**, *8*, 100305.
- 513 32. Juntunen, L. *Addressing Social Vulnerability to Hazards*. University of Oregon Eugene, 2004.
- 514 33. Assefa, N.; Oljira, L.; Baraki, N.; Demena, M.; Zelalem, D.; Ashenafi, W.; Dedefo, M. HDSS profile: the  
515 Kersa Health and Demographic Surveillance System. *International Journal of Epidemiology* **2016**, *45*,  
516 94-101.

- 
- 517 34. Cunningham, S.A.; Shaikh, N.I.; Nhacolo, A.; Raghunathan, P.L.; Kotloff, K.; Naser, A.M.; Mengesha,  
518 M.M.; Adedini, S.A.; Misore, T.; Onuwchekwa, U.U. Health and Demographic Surveillance Systems  
519 within the Child Health and Mortality Prevention Surveillance Network. *Clinical Infectious Diseases* **2019**,  
520 *69*, S274-S279.
- 521 35. Cunningham, S.A.; Muir, J.A. Data Cleaning. In *The Cambridge Handbook of Research Methods and Statistics*  
522 *for the Social and Behavioral Sciences: Volume 1: Building a Program of Research*; Cambridge University Press:  
523 In Press; Volume 1.
- 524 36. Cho, E. A comprehensive review of so-called Cronbach's alpha. *Journal of Product Research* **2020**, *38*, 9-20.
- 525 37. R Core Team *R: A Language and Environment for Statistical Computing*, R Foundation for Statistical  
526 Computing; Vienna, Austria, 2022.
- 527 38. Yeh, J.; D'Amico, F. Forest plots: data summaries at a glance. *Journal of Family Practice* **2004**, *53*,  
528 1007-1008.
- 529 39. Lewis, S.C.; Keerie, C.; Assi, V. Forest Plot. In *Wiley StatsRef: Statistics Reference Online*; pp. 1-6.

530 **Disclaimer/Publisher's Note:** The findings and conclusions in this report are those of the authors and do not  
531 necessarily represent the views of the US Centers for Disease Control and Prevention. Likewise, the statements,  
532 opinions and data contained in all publications are solely those of the individual author(s) and contributor(s) and  
533 not of MDPI and/or the editor(s). MDPI and/or the editor(s) disclaim responsibility for any injury to people or  
534 property resulting from any ideas, methods, instructions or products referred to in the content.
